# Supplementary material for: α-Tubulin detyrosination links the suppression of MCAK activity with taxol cytotoxicity
Source: PubMed Central journal article supplement — J Cell Biol. 2022 Dec 2;222(2):e202205092. doi: 10.1083/jcb.202205092 (PMC9723805; doi:10.1083/jcb.202205092), 2022-12-02

Control  
siαTAT1

**Fig. 4A**

Control  
siαTAT1

63kDa-  
←

Acetyl tub

63kDa-  
←

β-tub

DMSO  
Tubastatin A

**Fig. 4C**

DMSO  
Tubastatin A

→ 63kDa

Acetyl tub

63kDa-  
→

β-tub

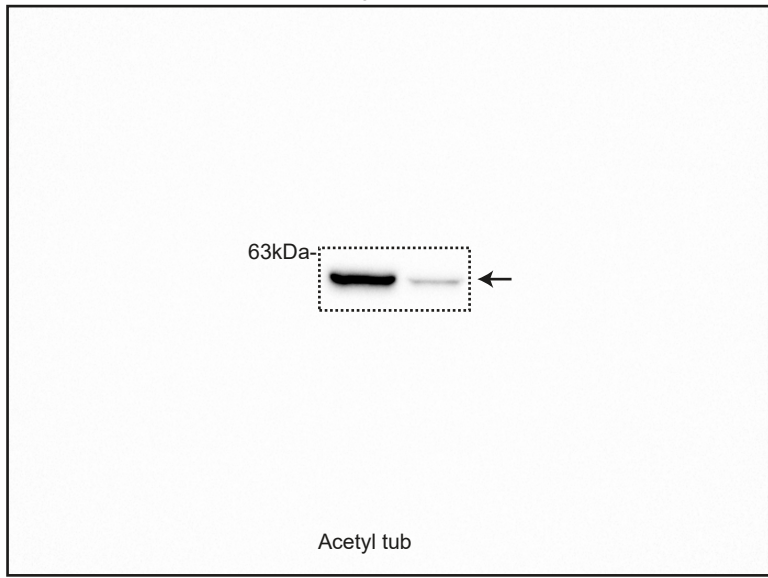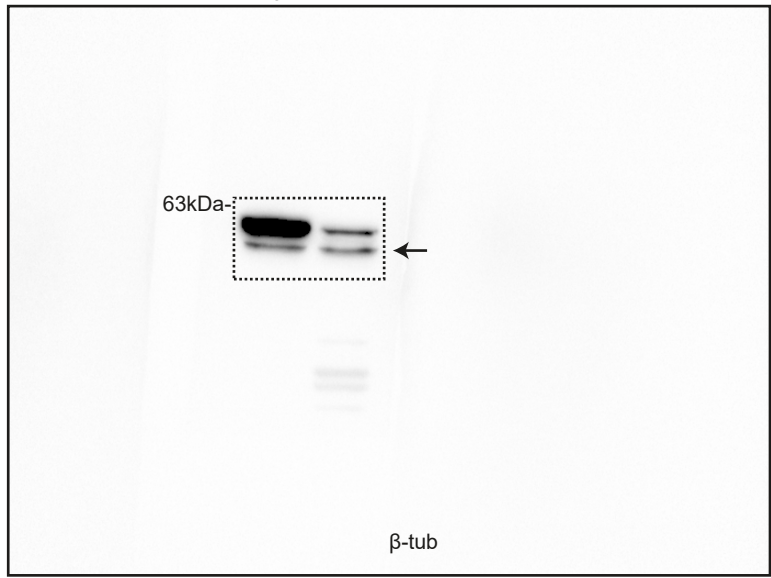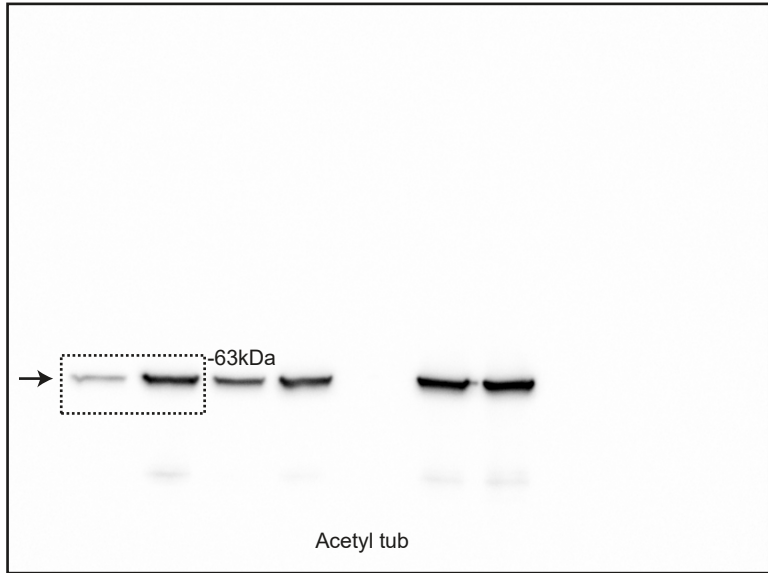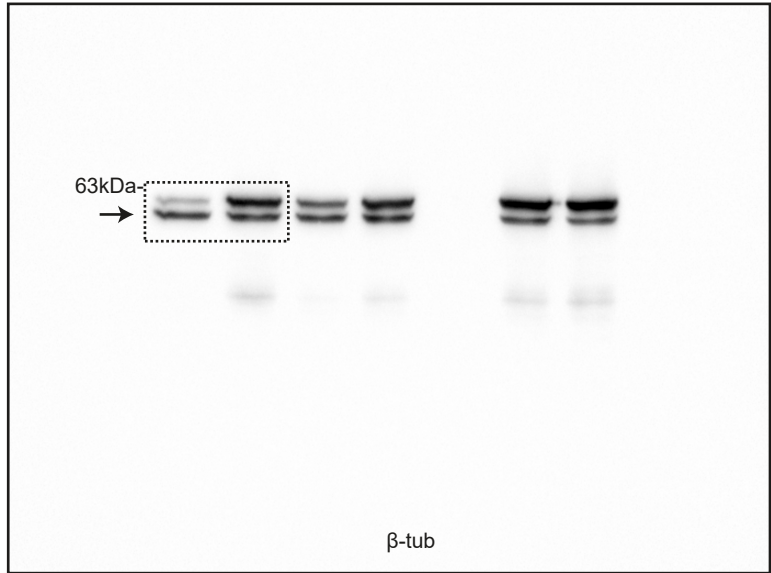

**Fig. 4E**

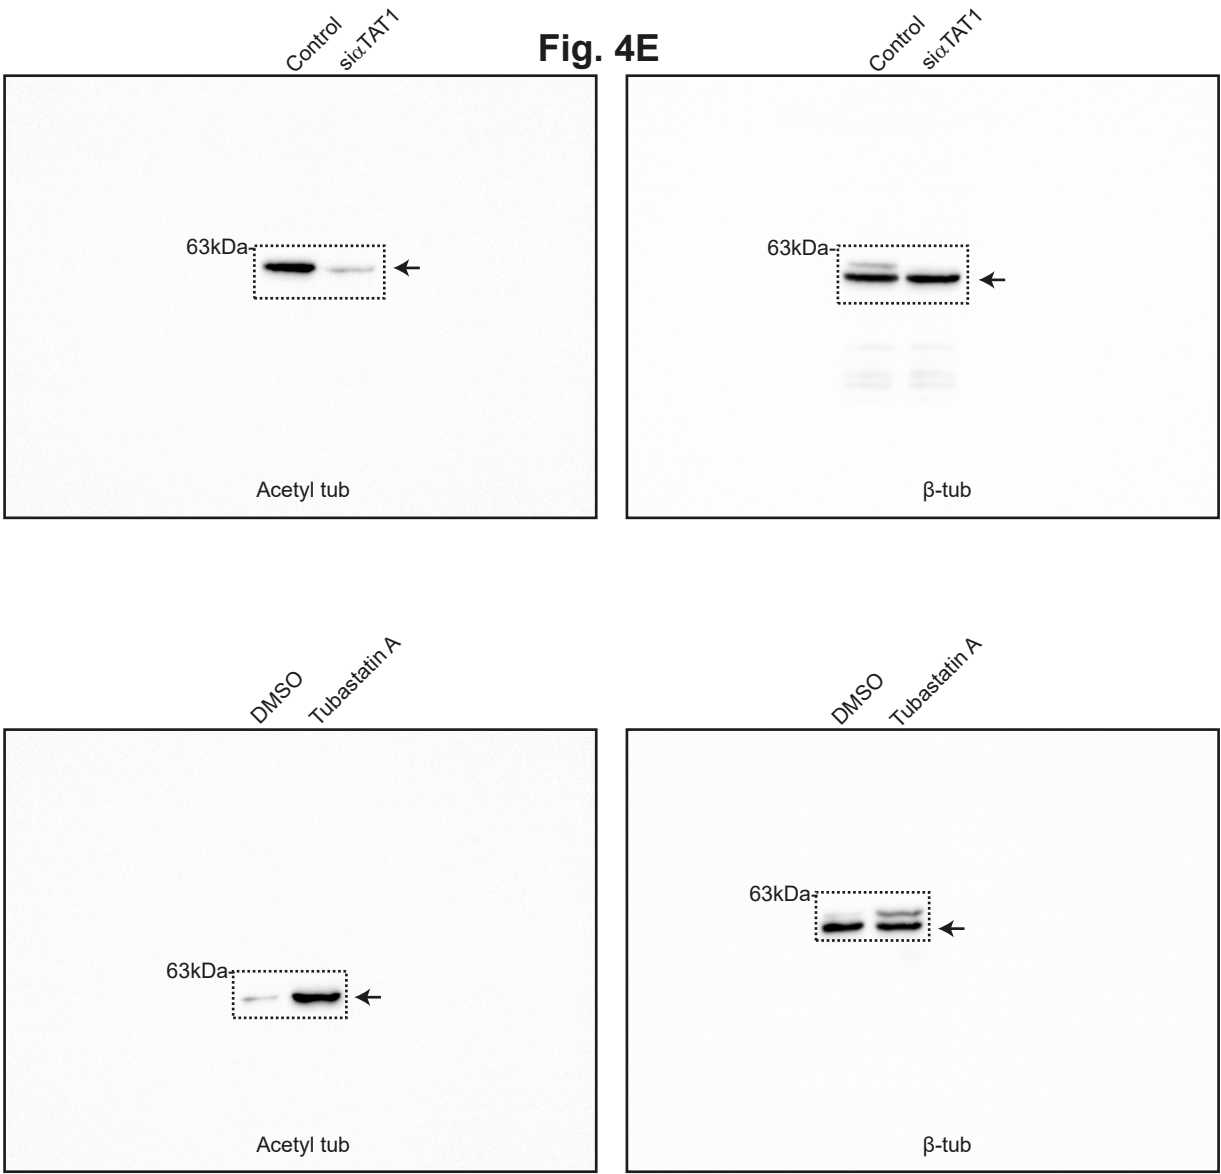

Supplement: JCB_202205092_SourceDataF4.pdf [file JCB_202205092_SourceDataF4.pdf]
