# Supplementary figures and images for: α-Tubulin detyrosination links the suppression of MCAK activity with taxol cytotoxicity
Source: PubMed Central journal article supplement — J Cell Biol. 2022 Dec 2;222(2):e202205092. doi: 10.1083/jcb.202205092 (PMC9723805; doi:10.1083/jcb.202205092), 2022-12-02

OVCAR-4  
UO-31  
HOP-92  
KM12  
HCT-116  
MDA-MB-435

**Fig. 3B**

OVCAR-4  
UO-31  
HOP-92  
KM12  
HCT-116  
MDA-MB-435

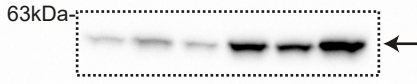

Acetyl tub

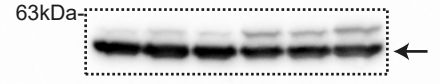

$\beta$ -tub

Supplement: JCB_202205092_SourceDataF3.pdf [file JCB_202205092_SourceDataF3.pdf]

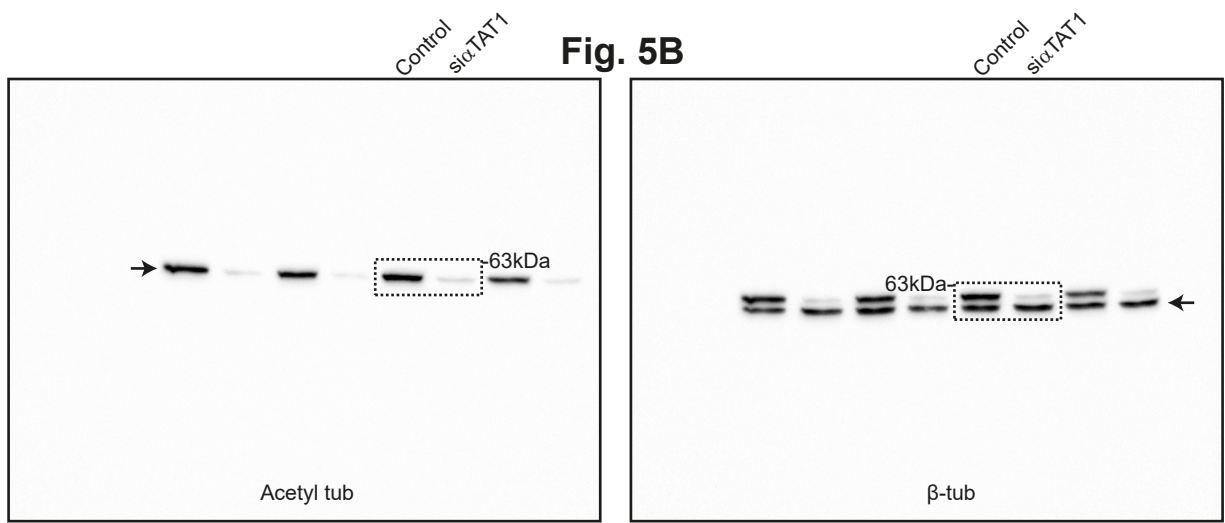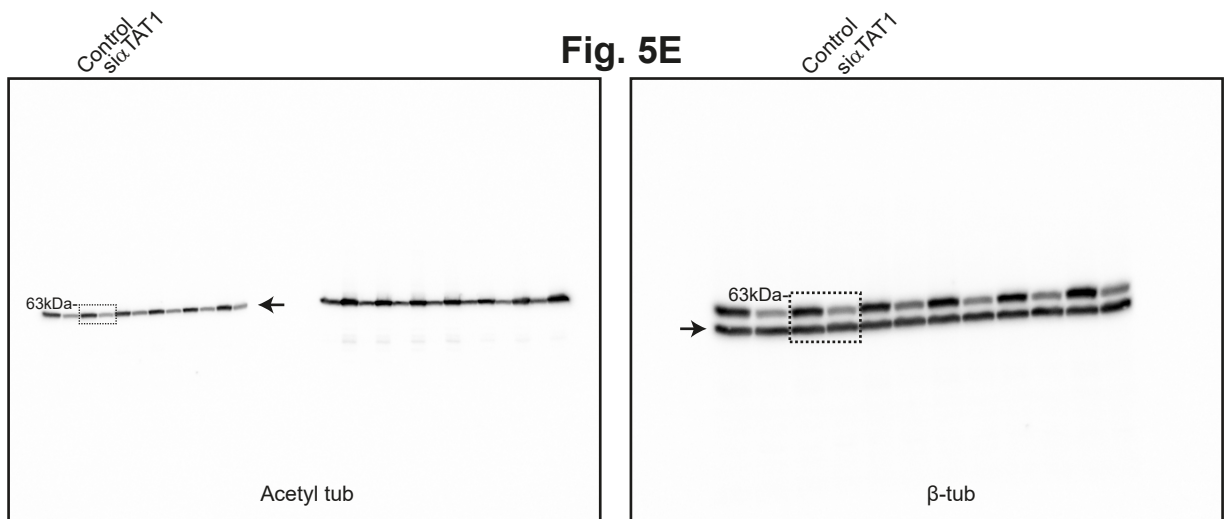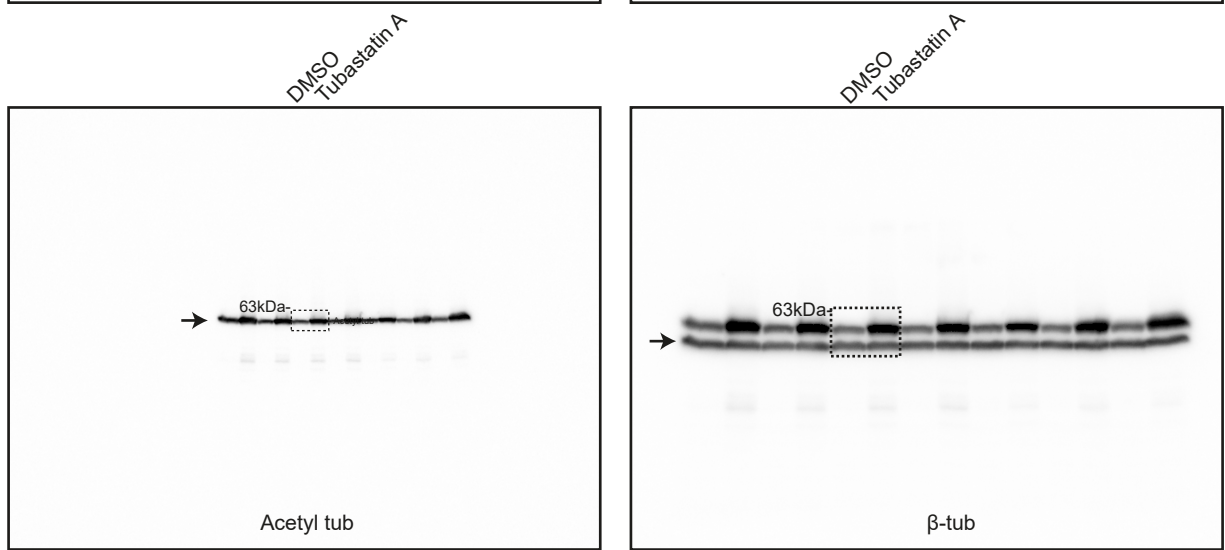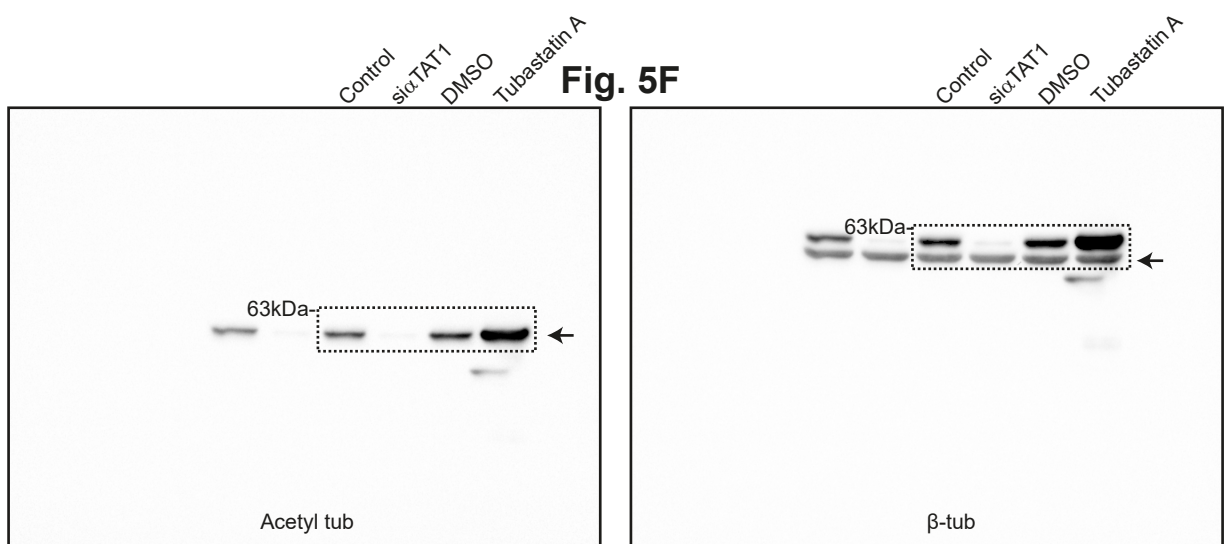

Supplement: JCB_202205092_SourceDataF5.pdf [file JCB_202205092_SourceDataF5.pdf]

**Fig. 6A**

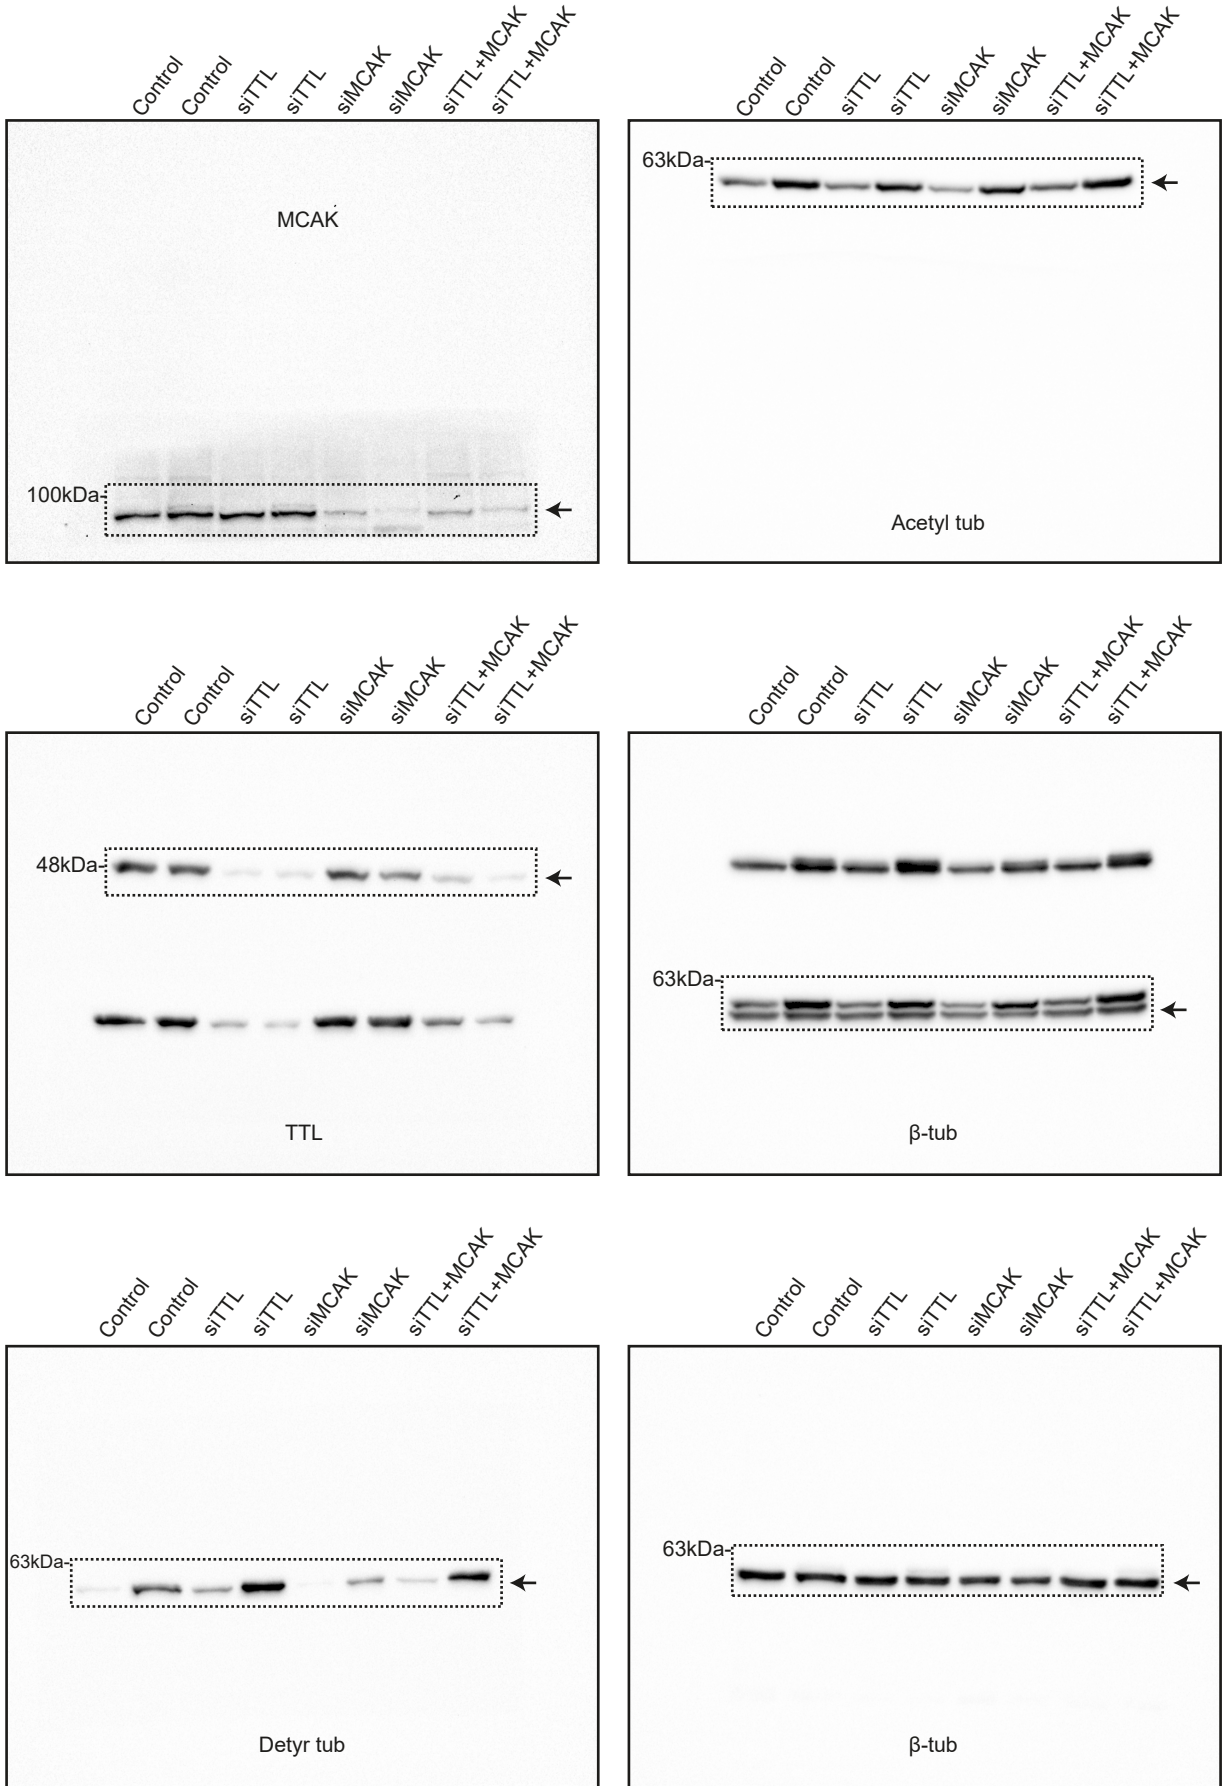

**Fig. 6B**

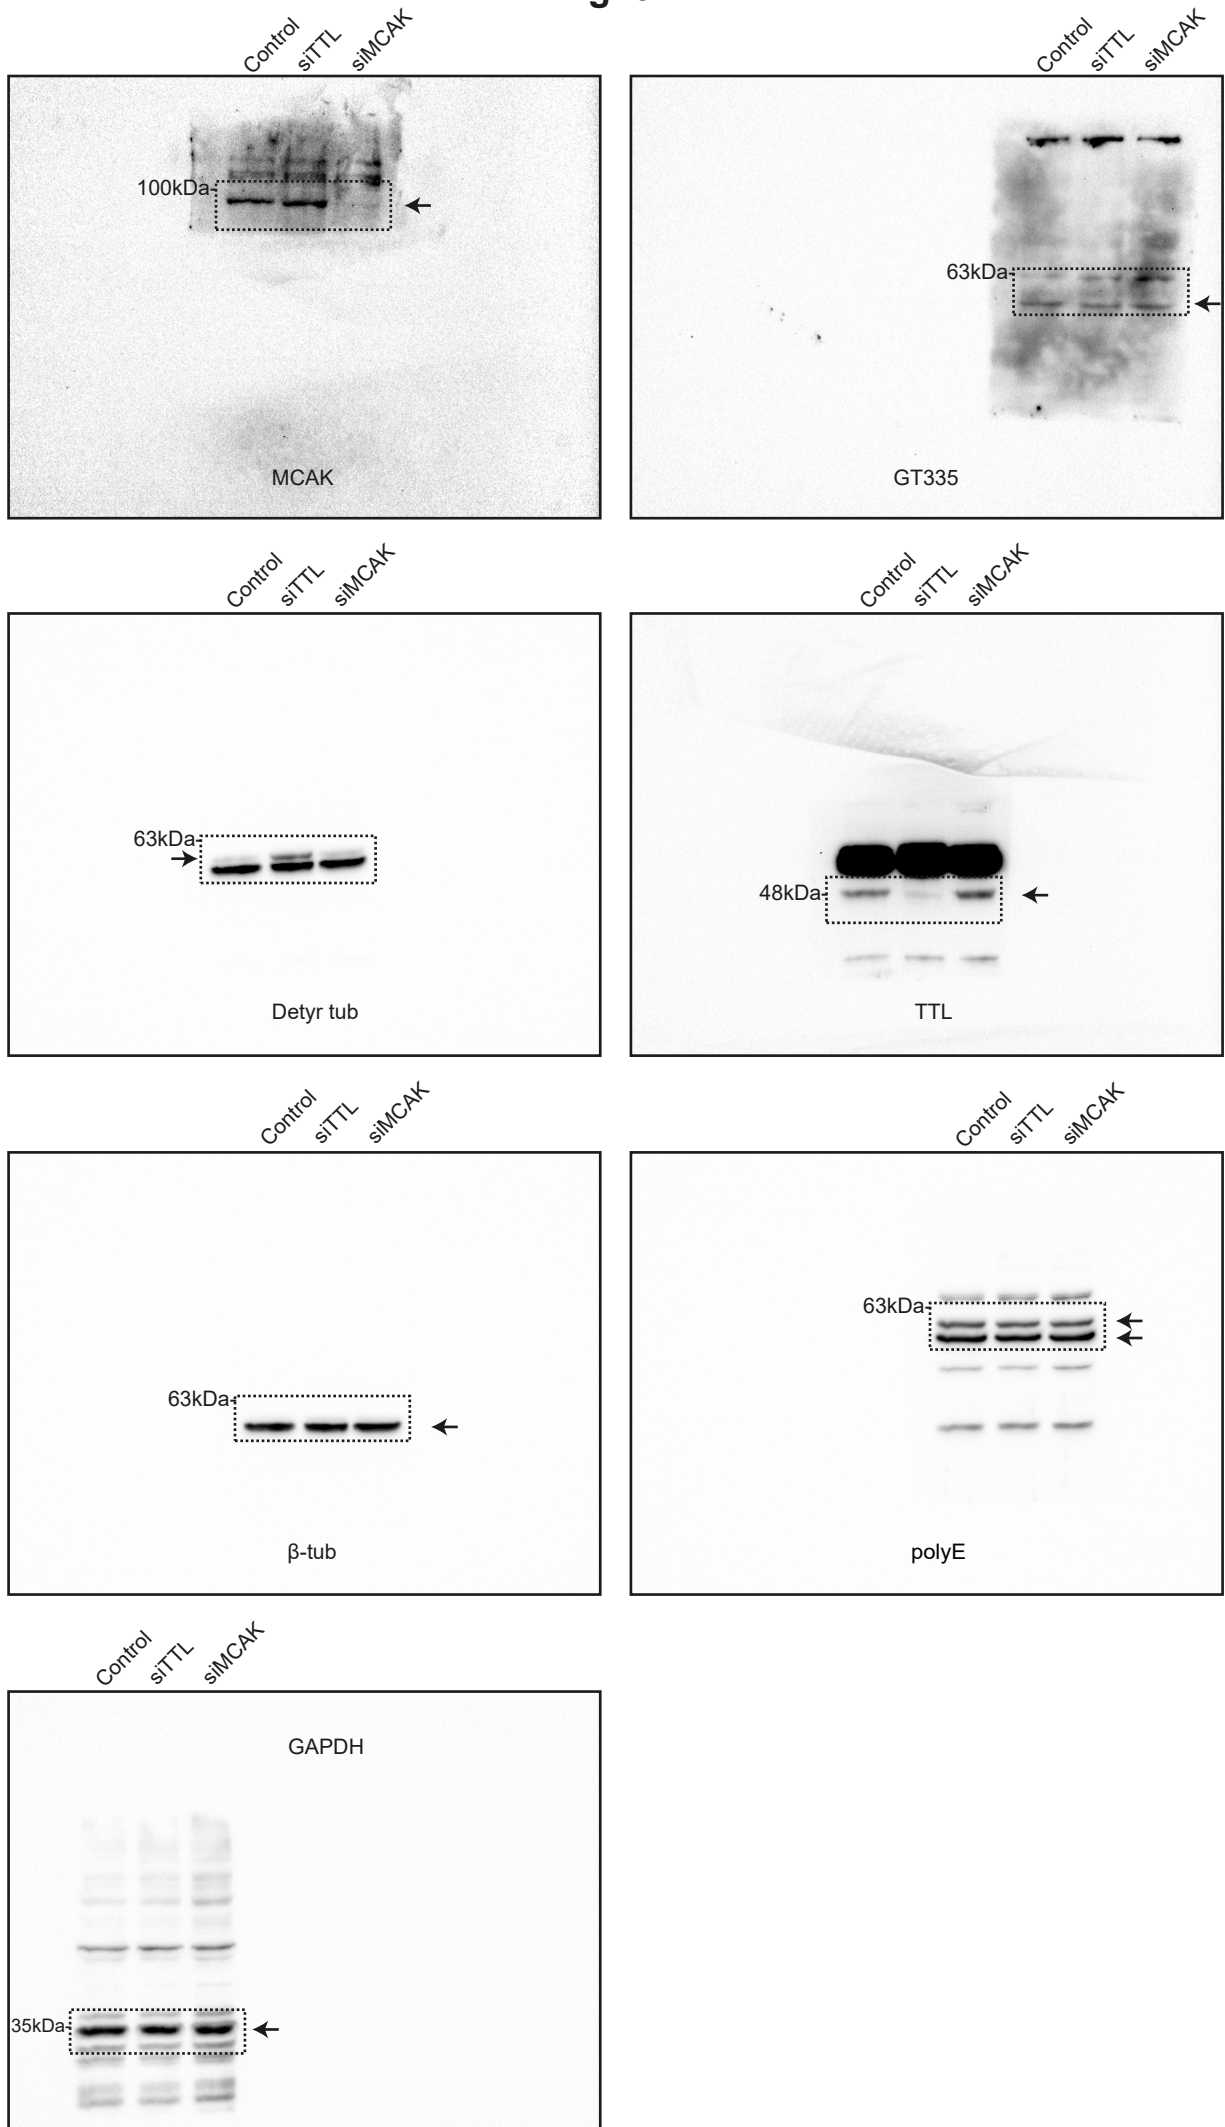

Supplement: JCB_202205092_SourceDataF6.pdf [file JCB_202205092_SourceDataF6.pdf]

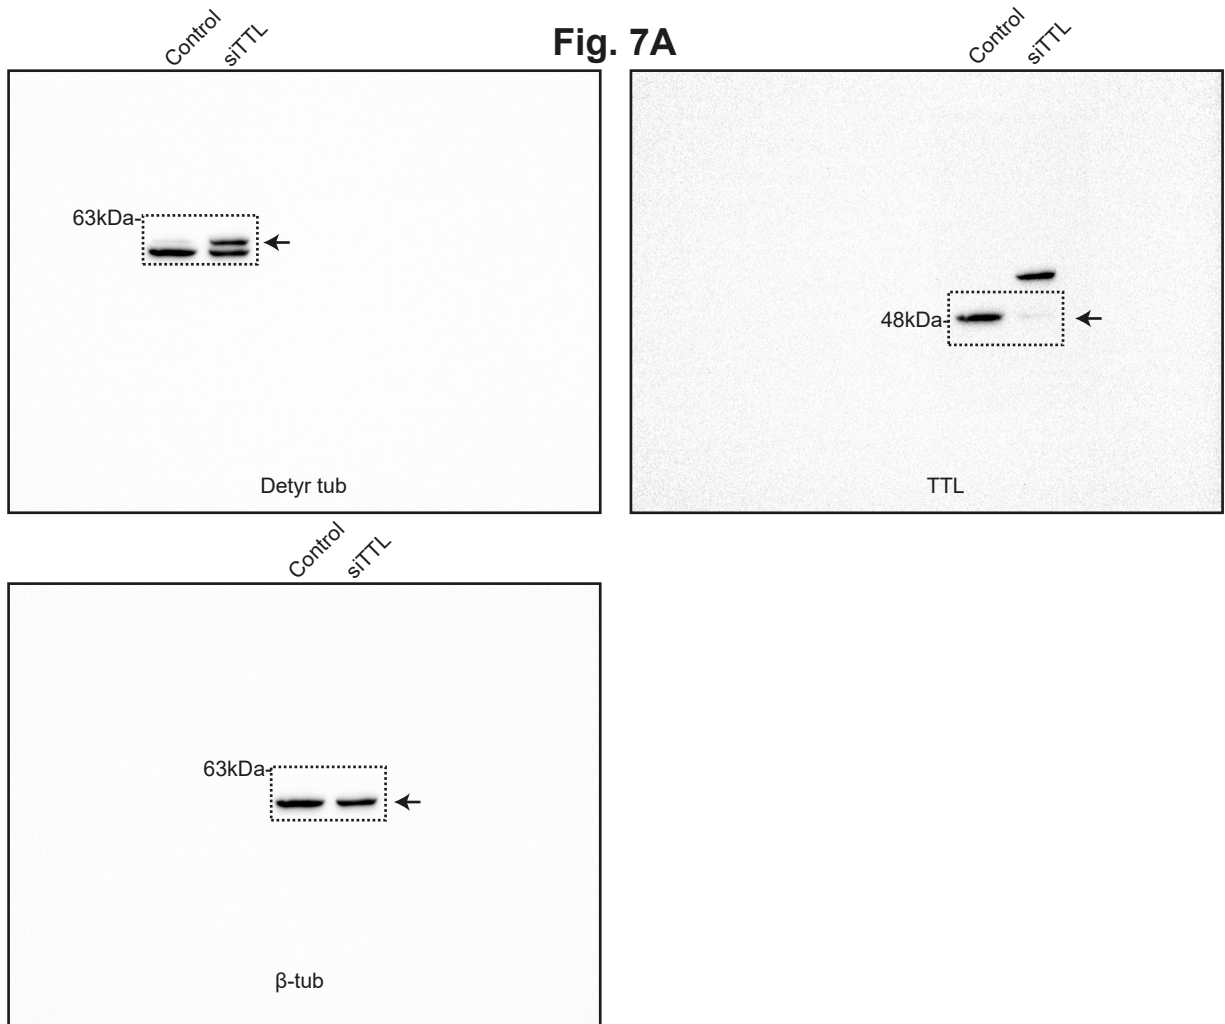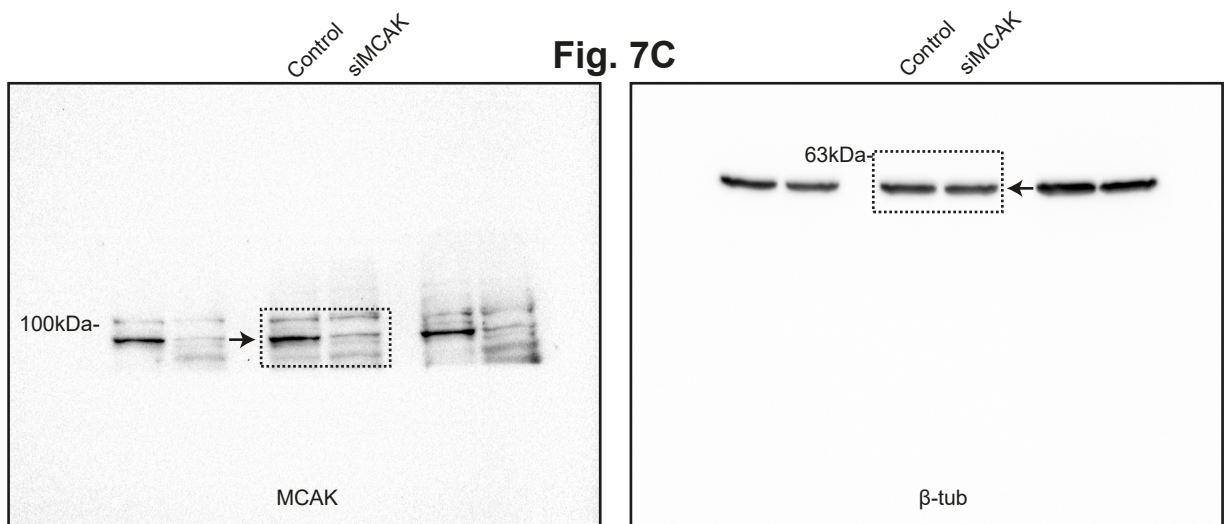

**Fig. 7F**

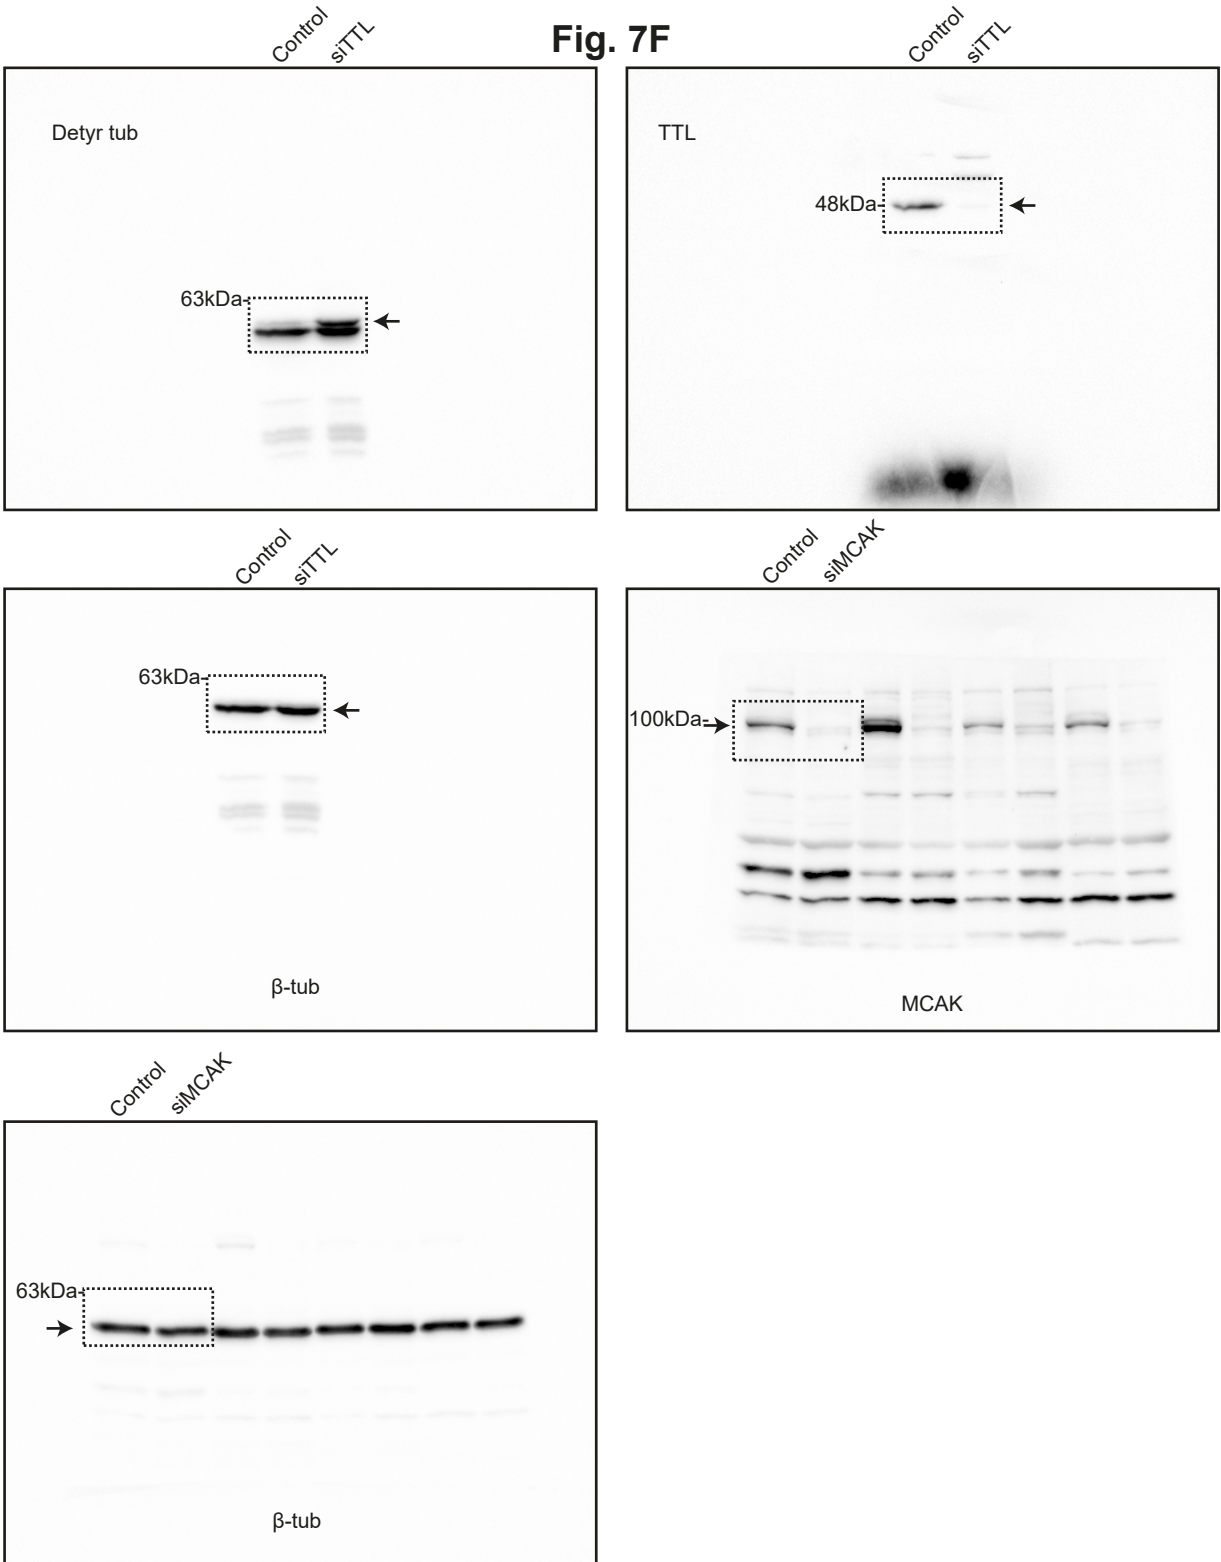

Supplement: JCB_202205092_SourceDataF7.pdf [file JCB_202205092_SourceDataF7.pdf]

Fig. S1

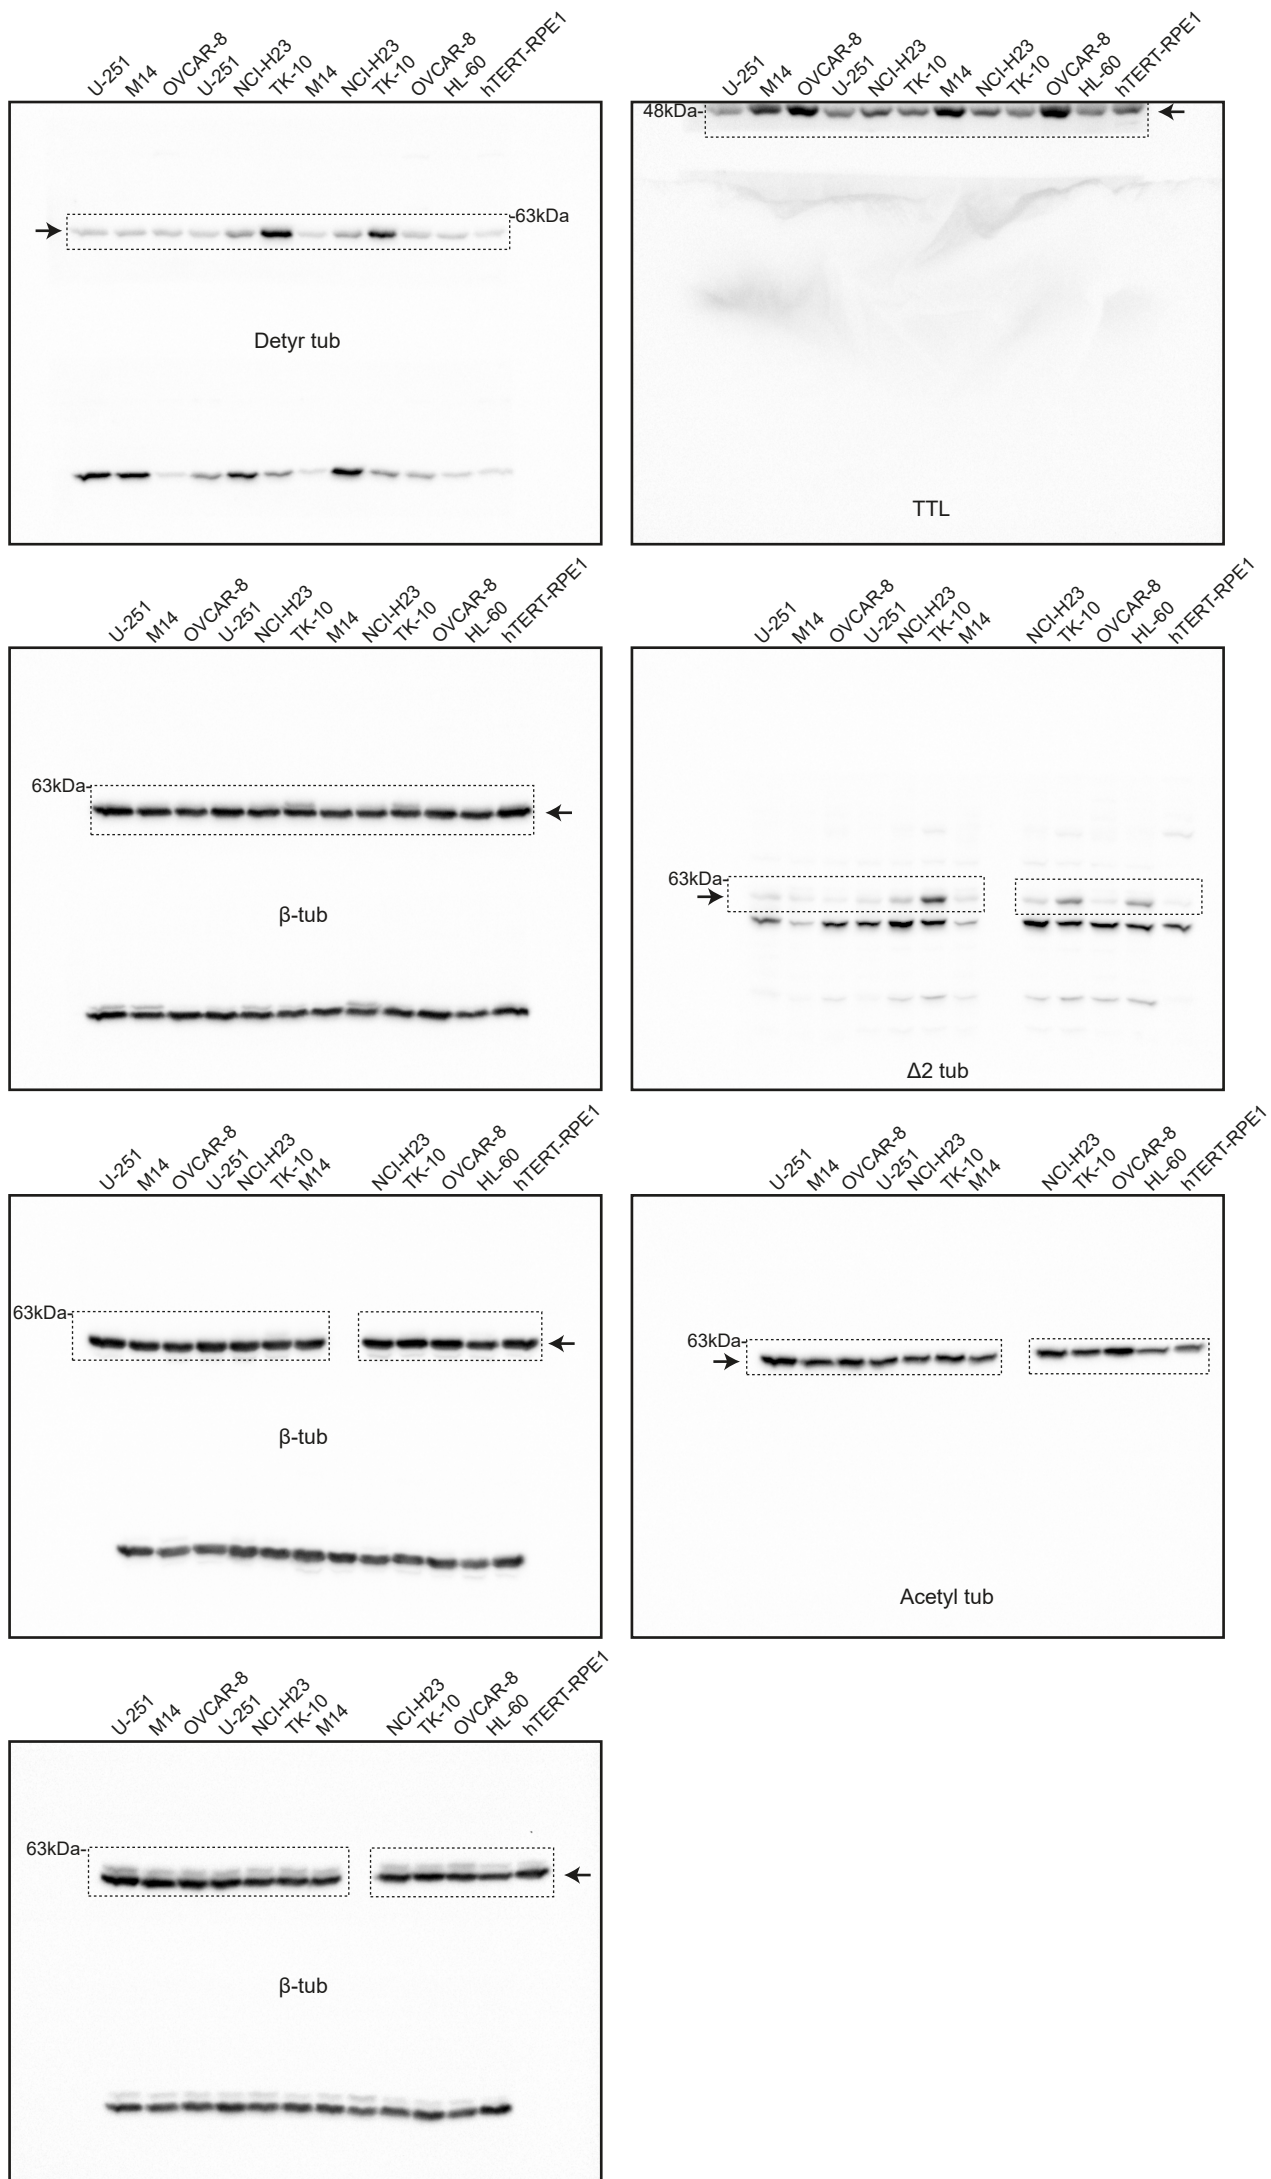

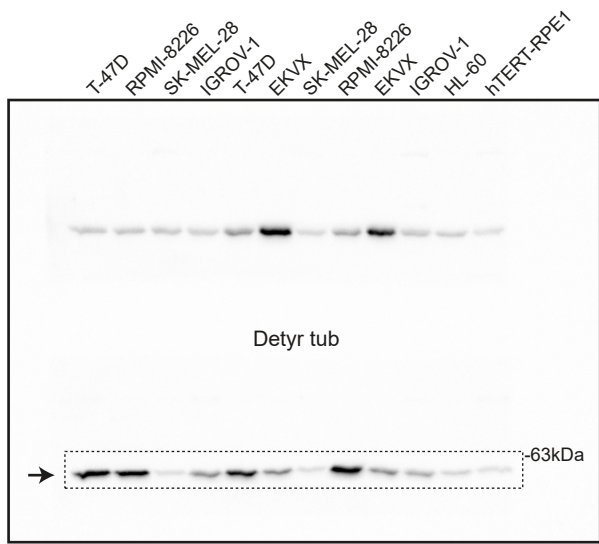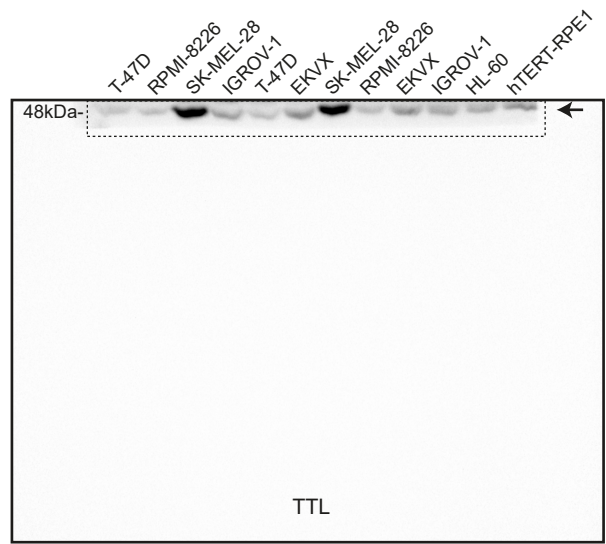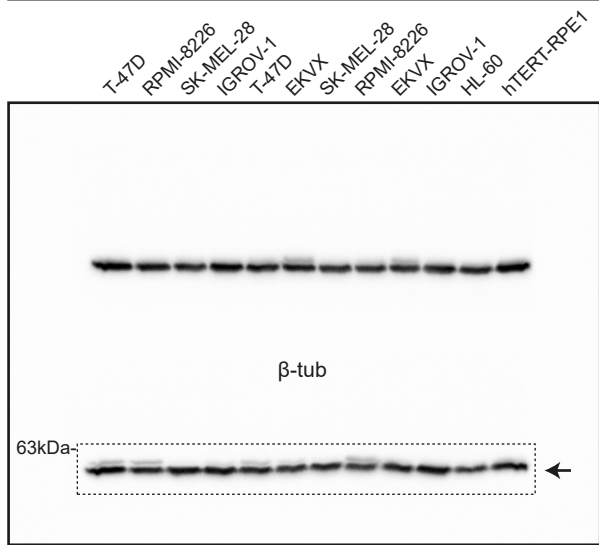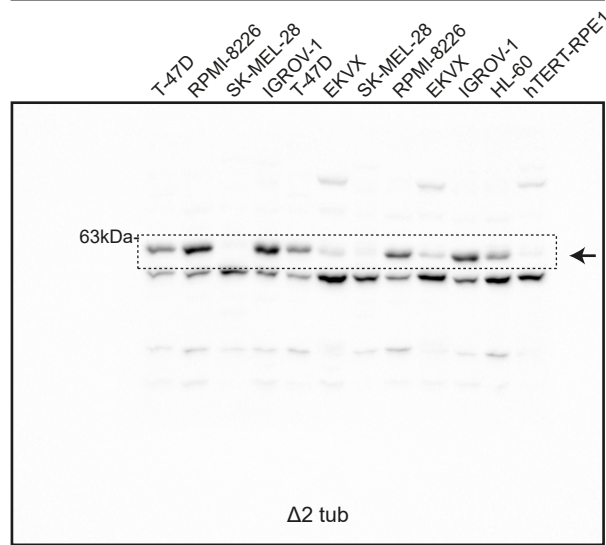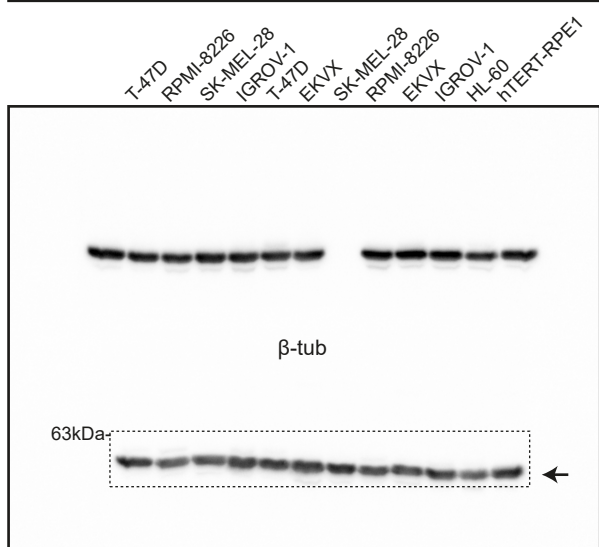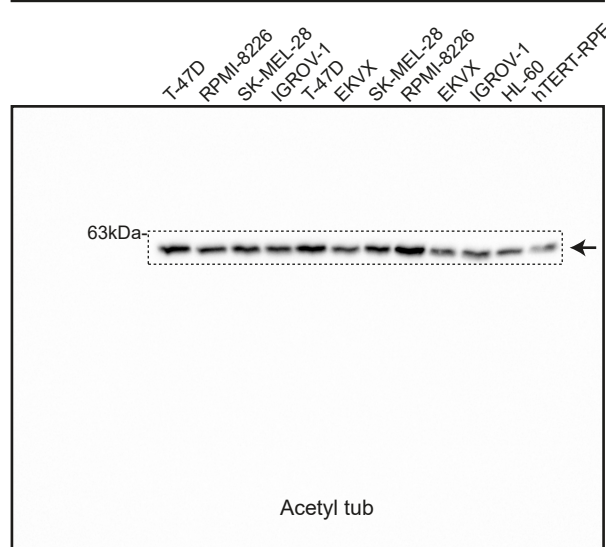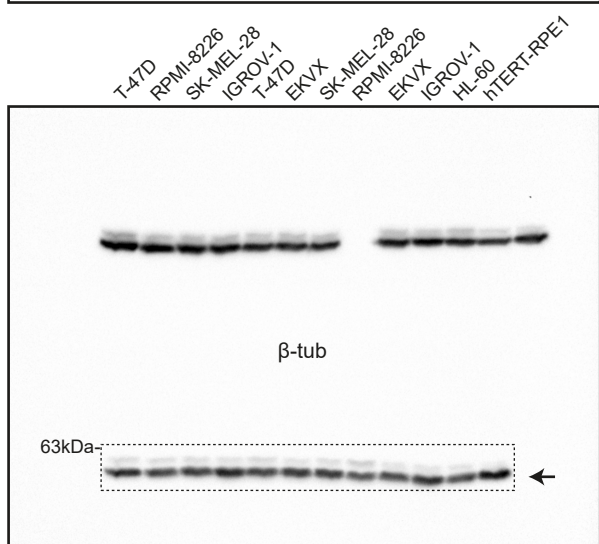

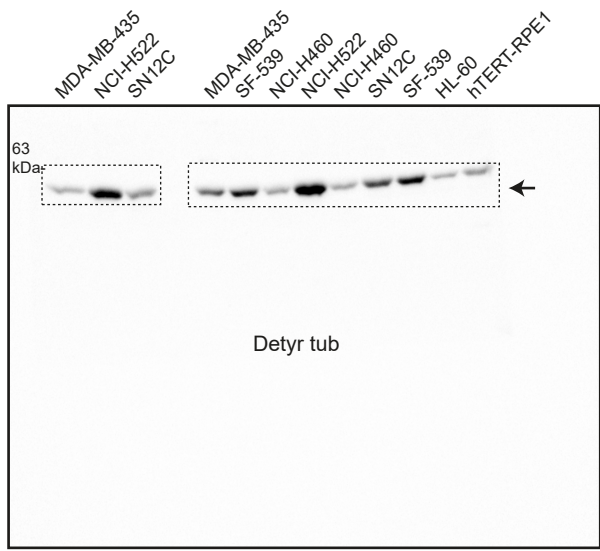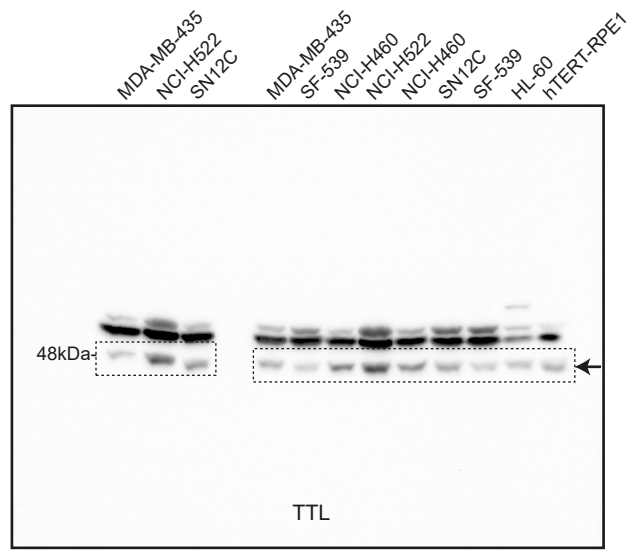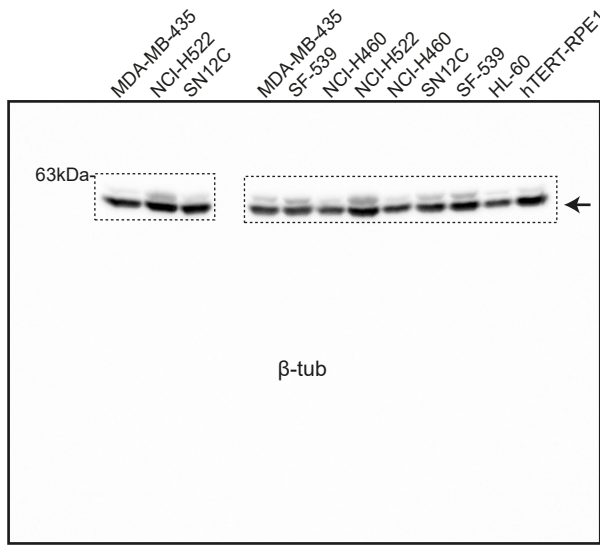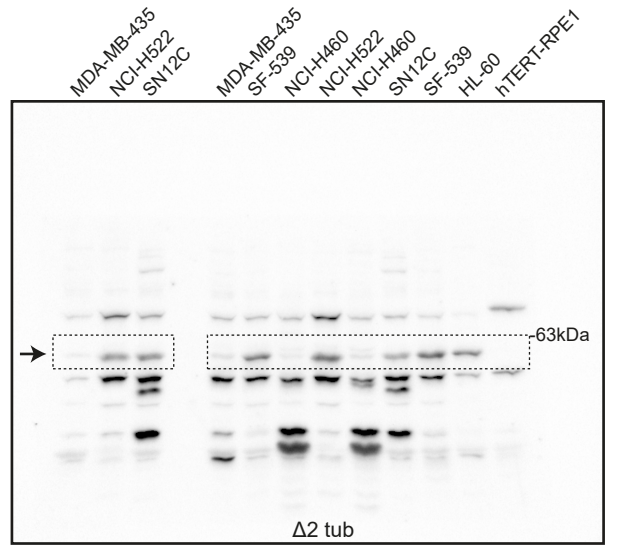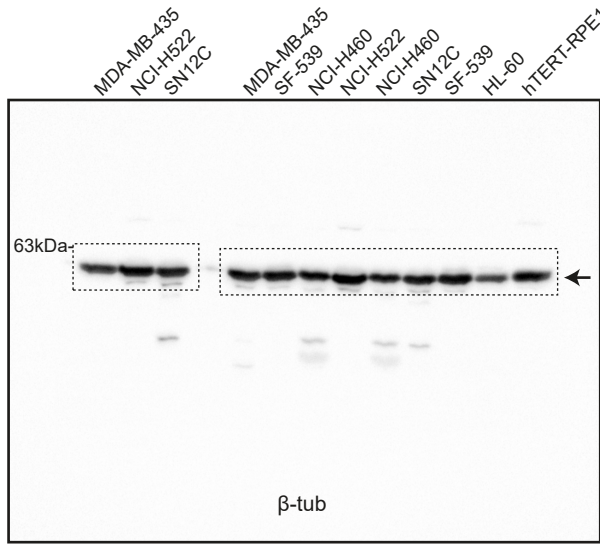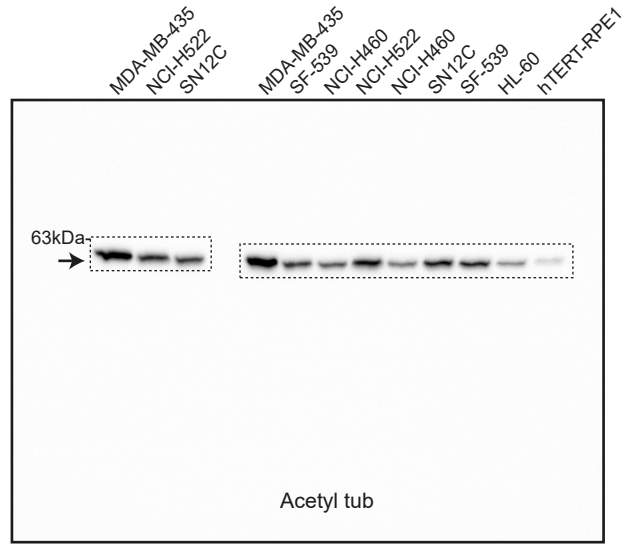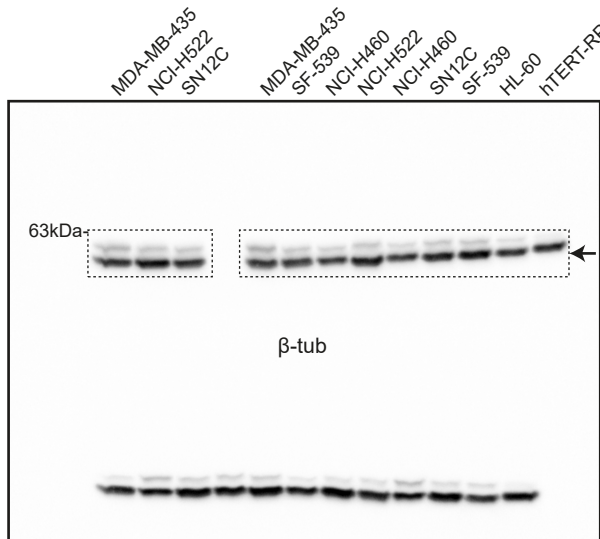

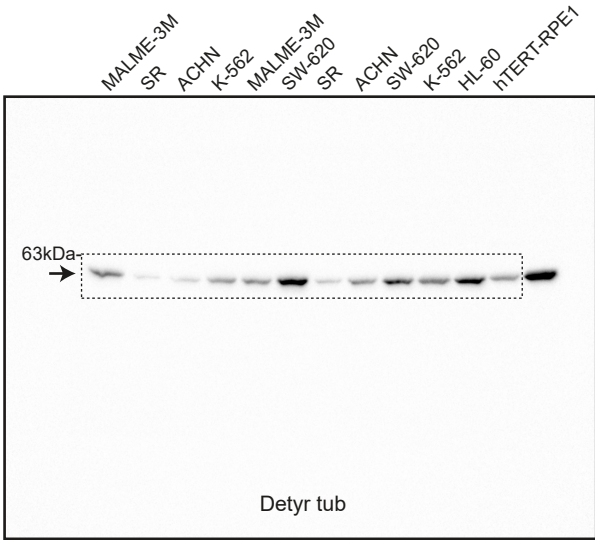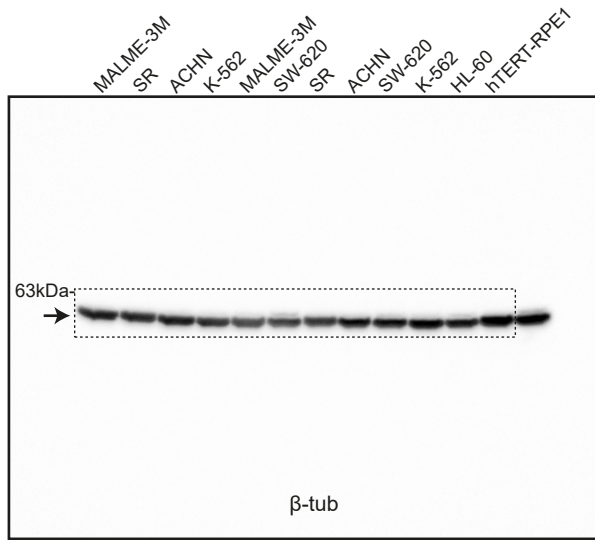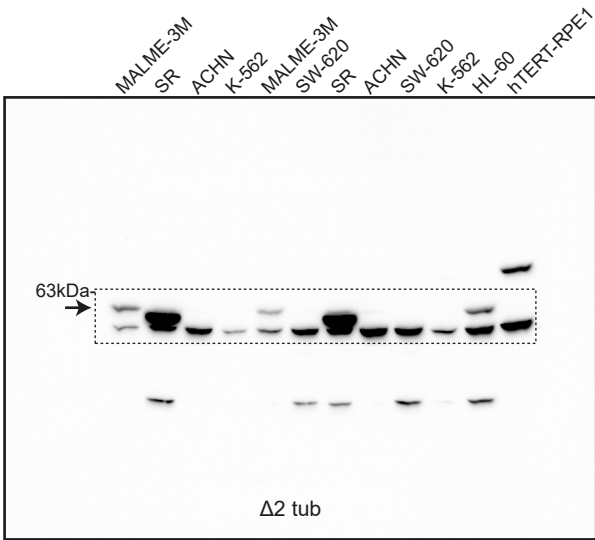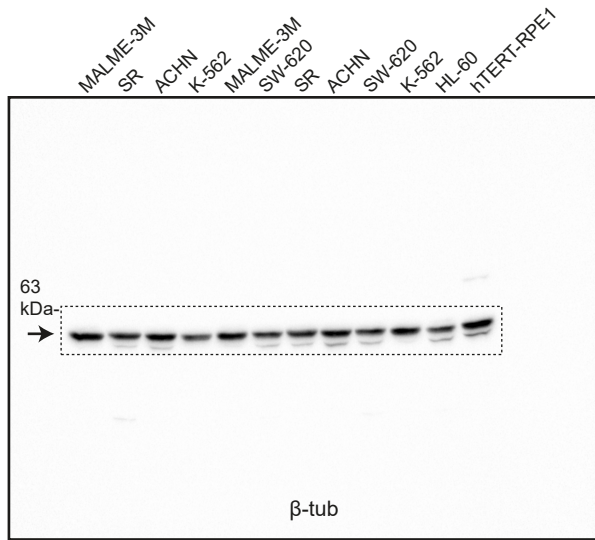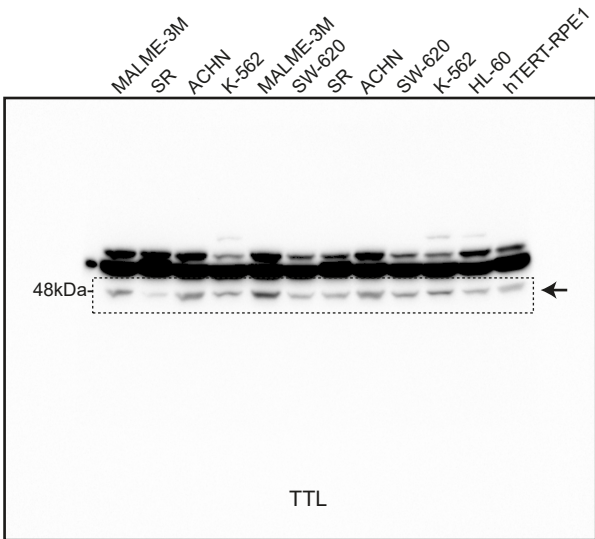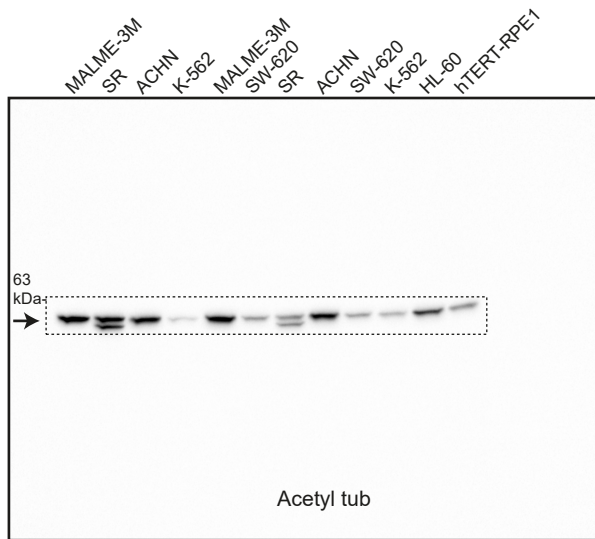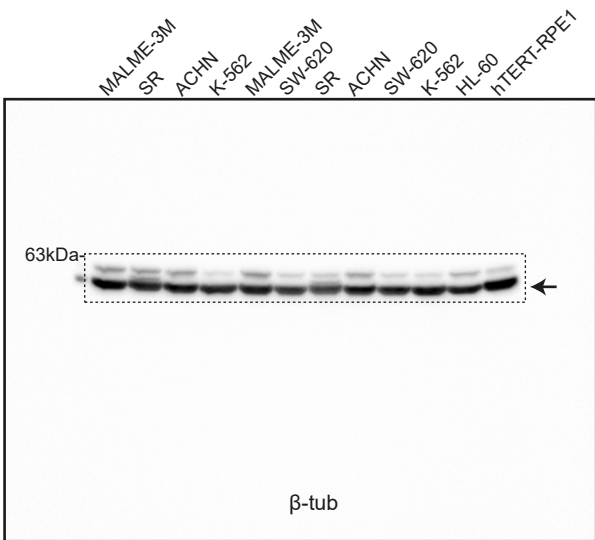

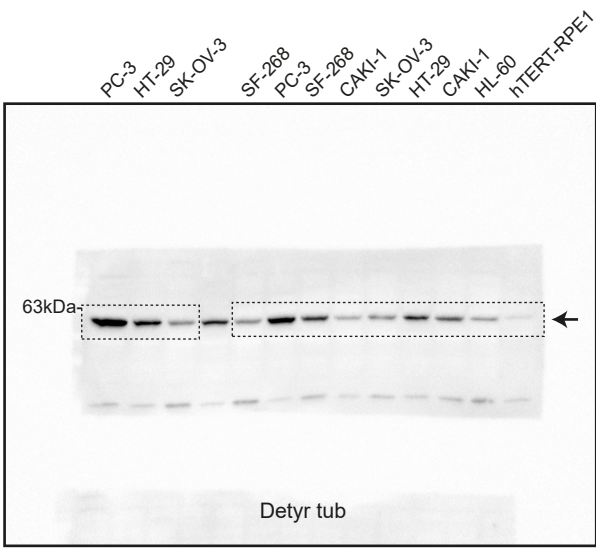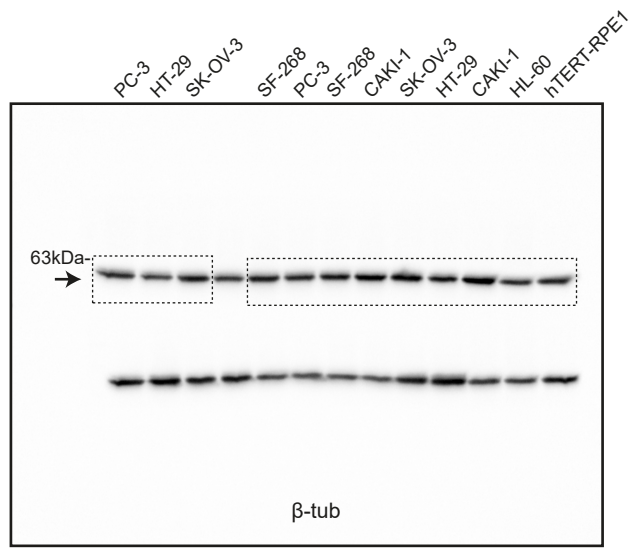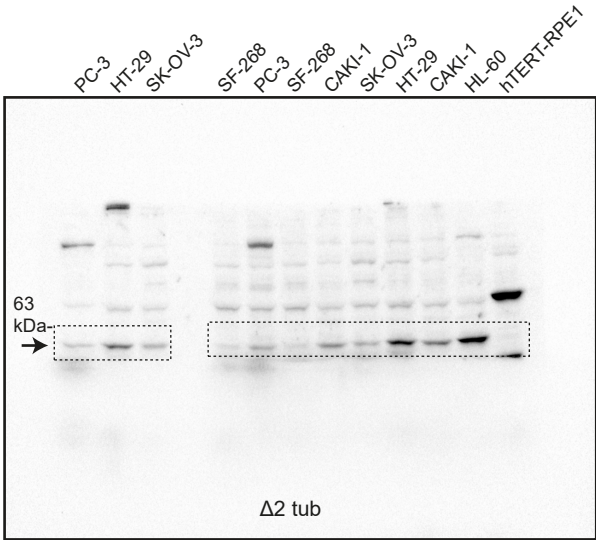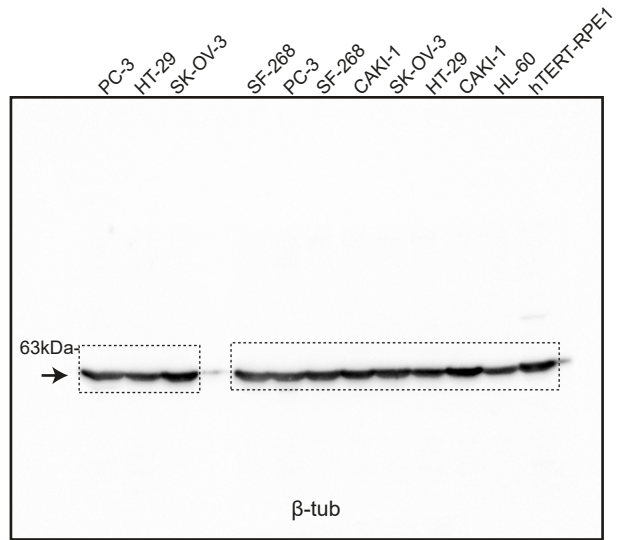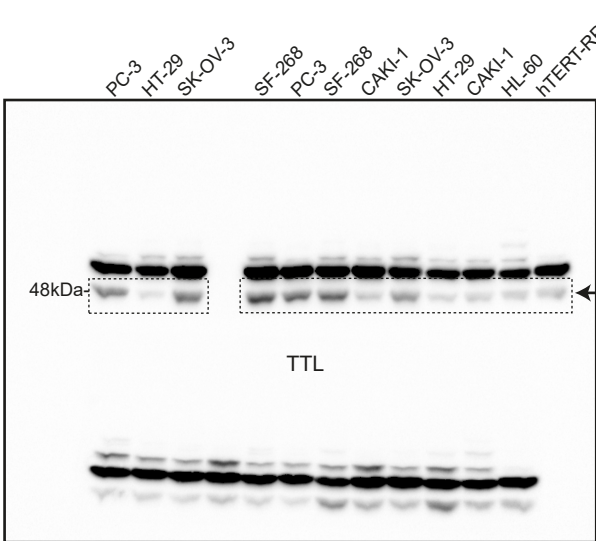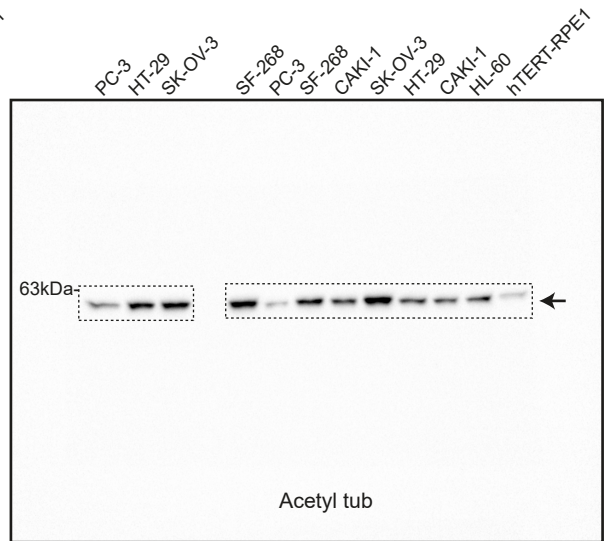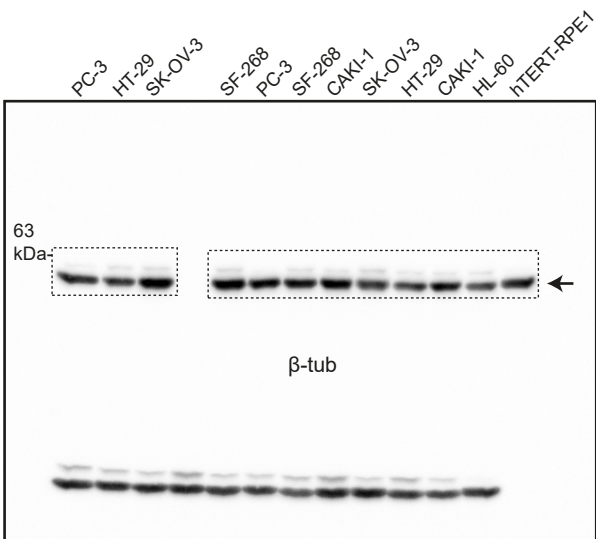

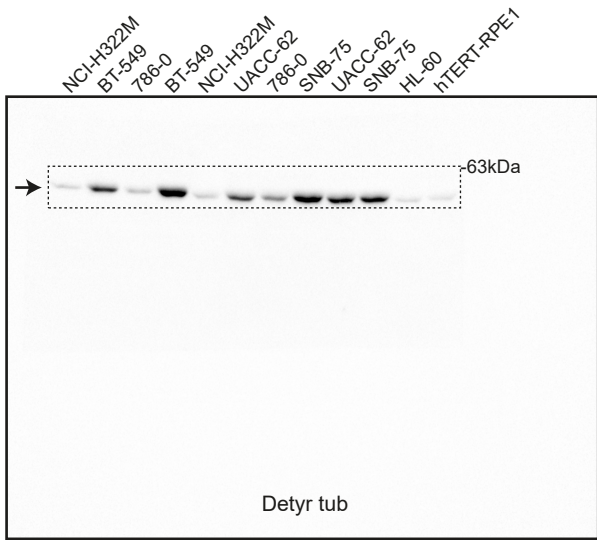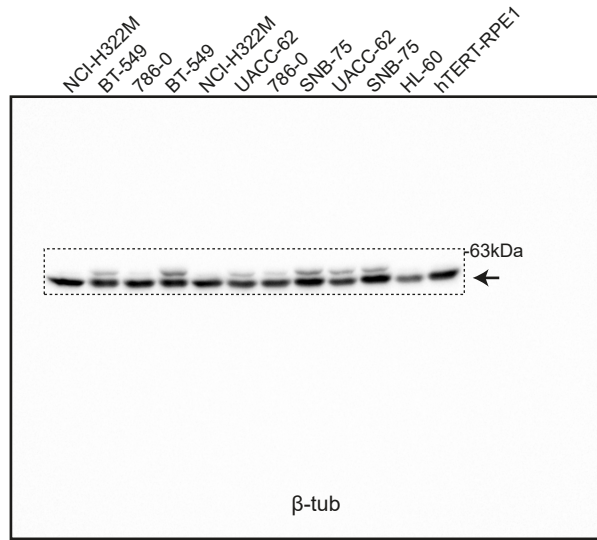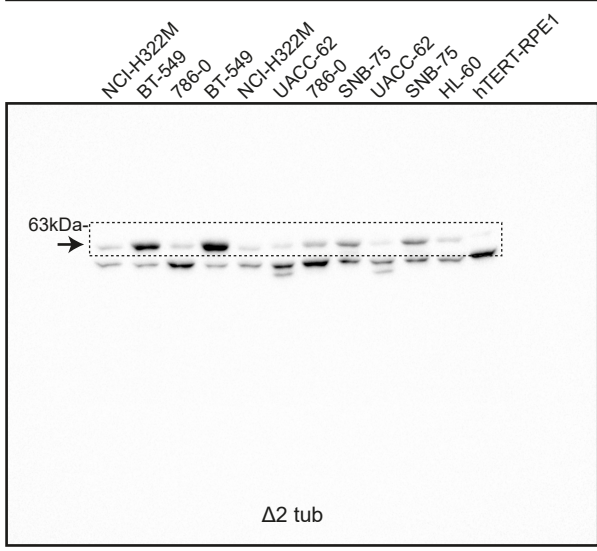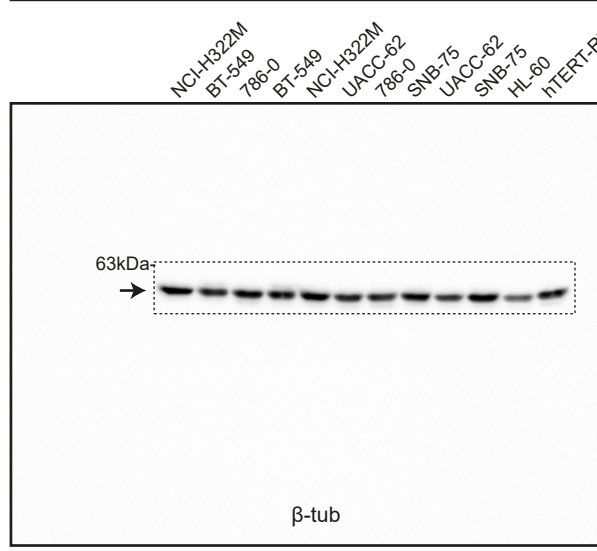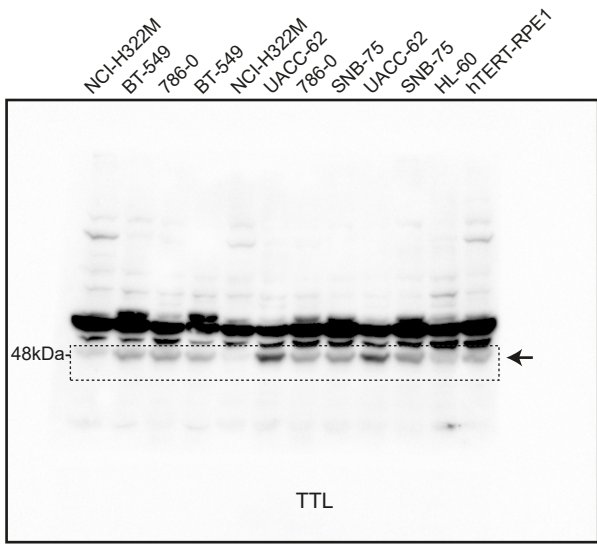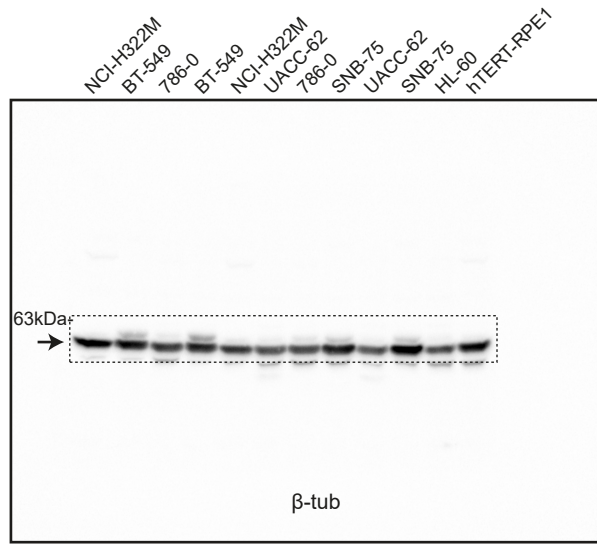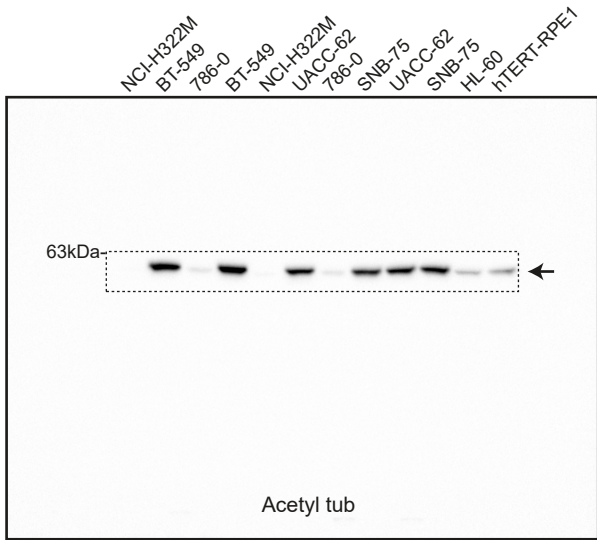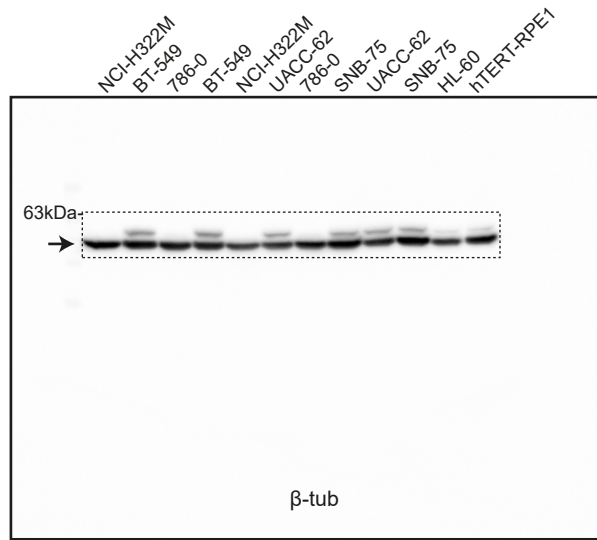

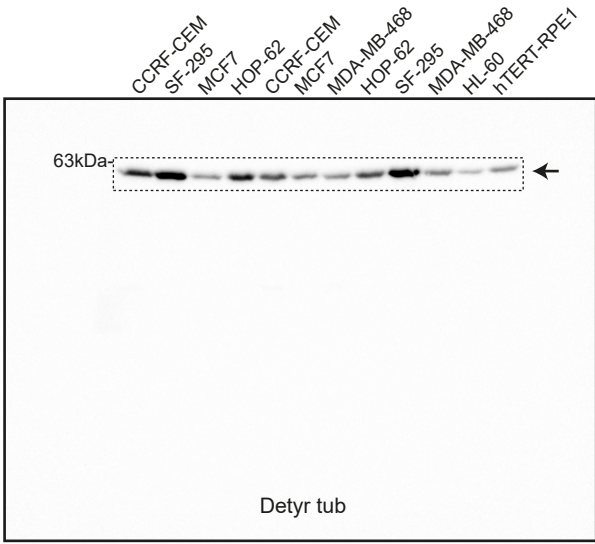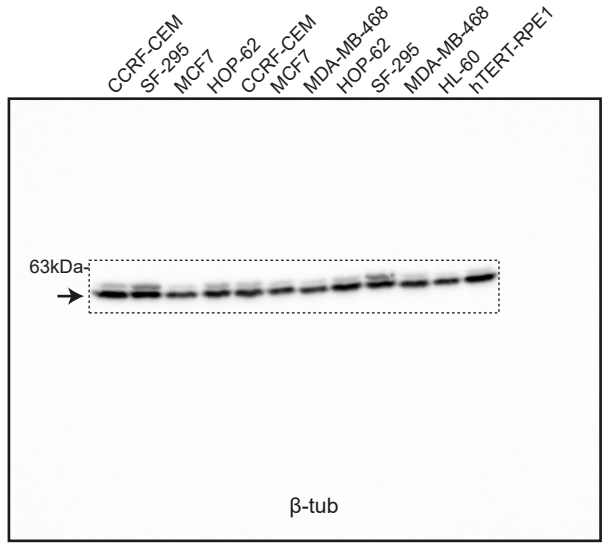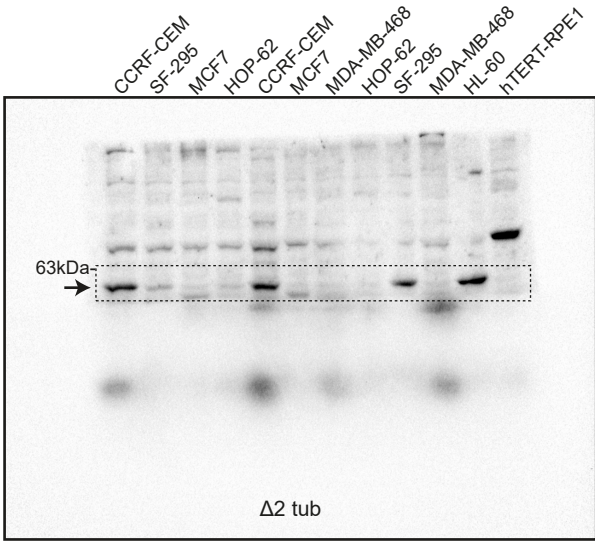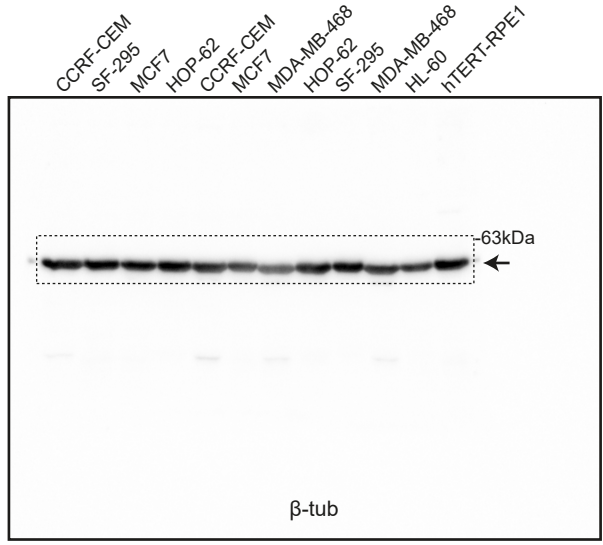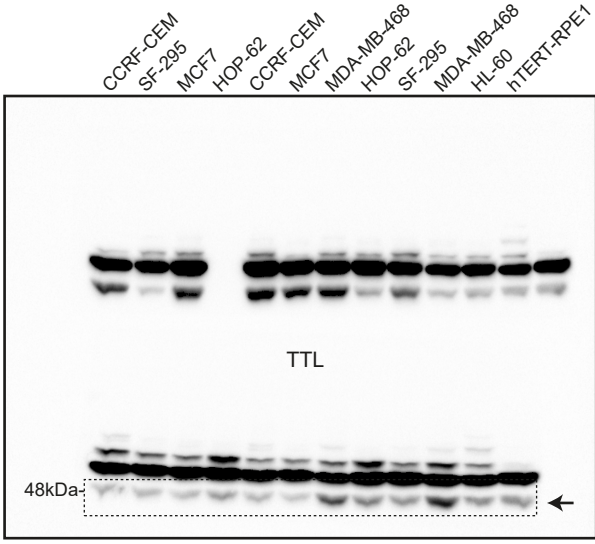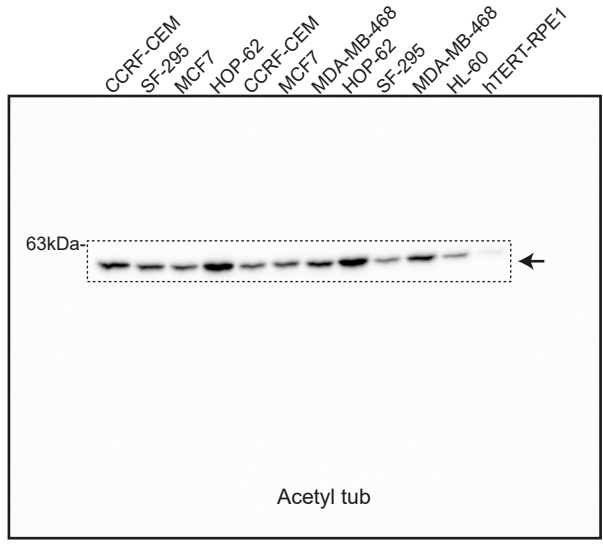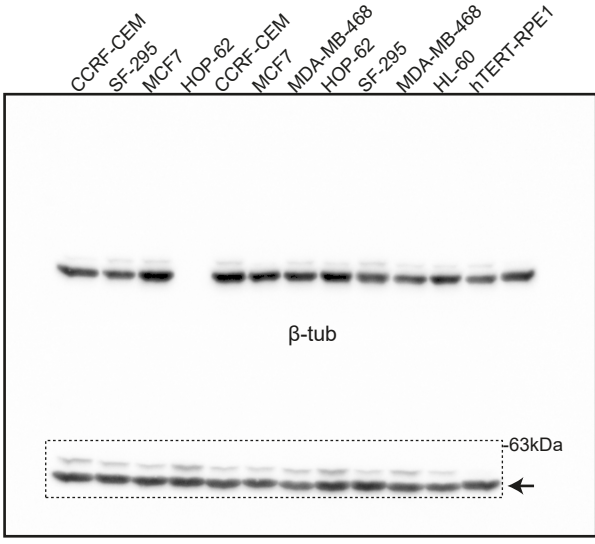

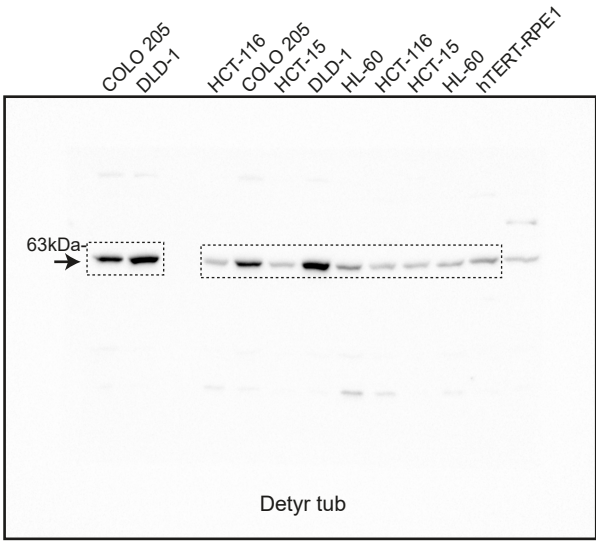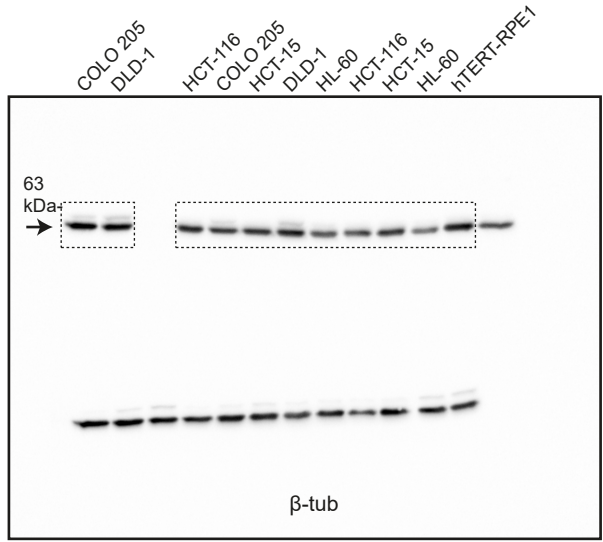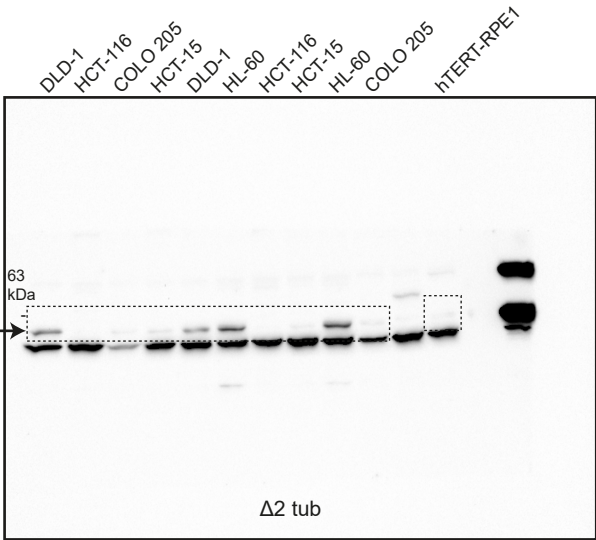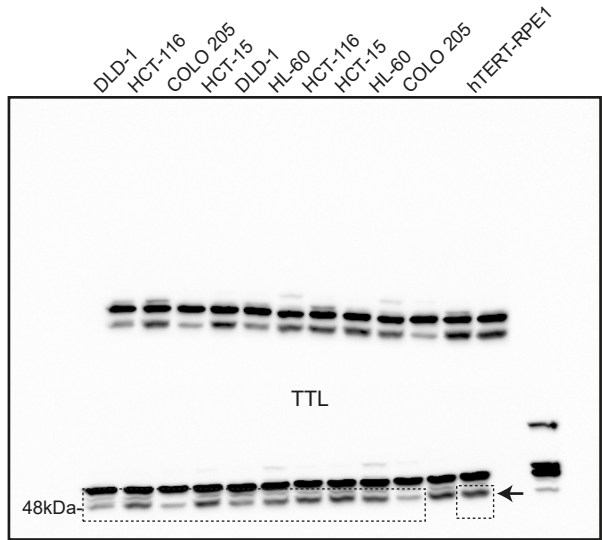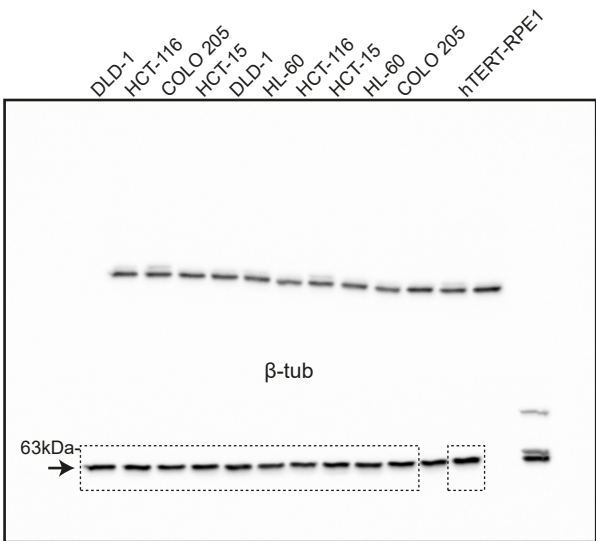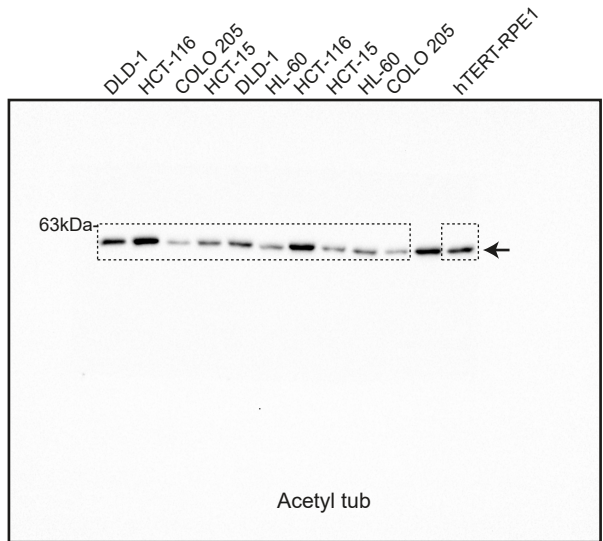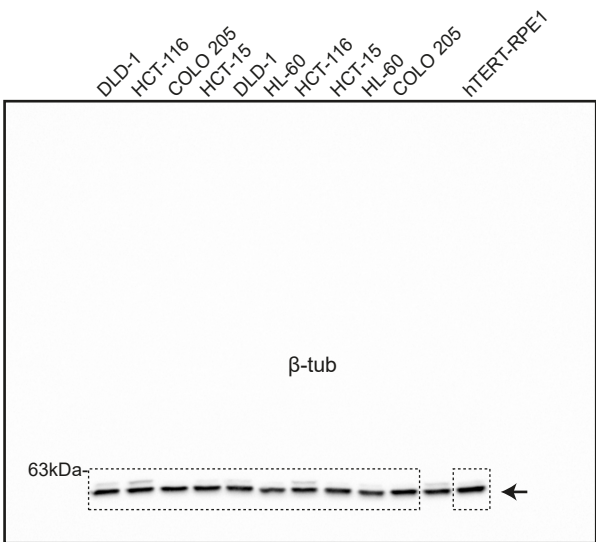



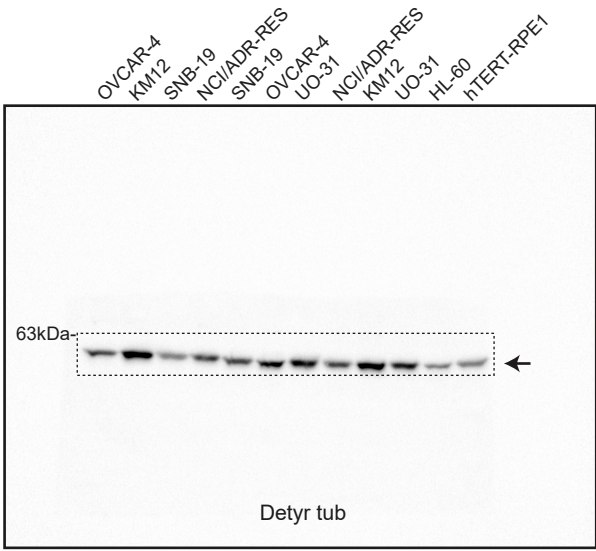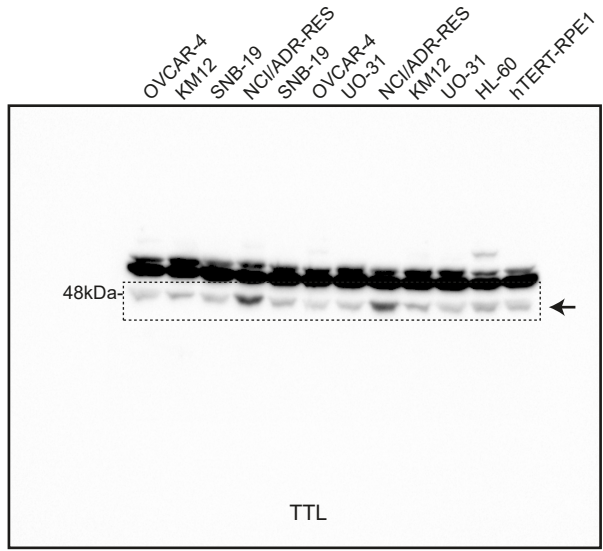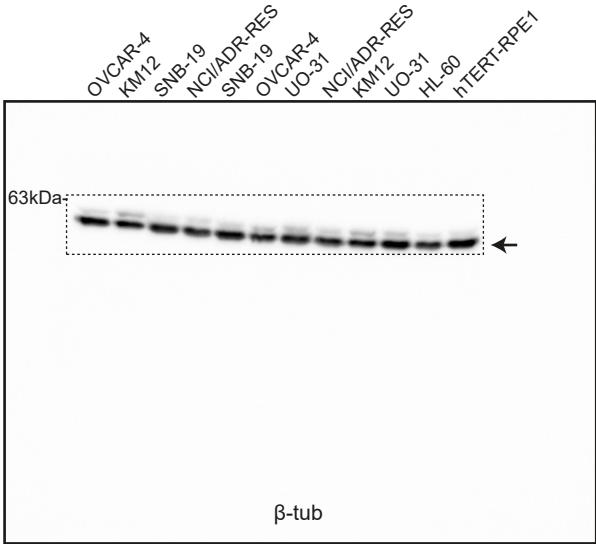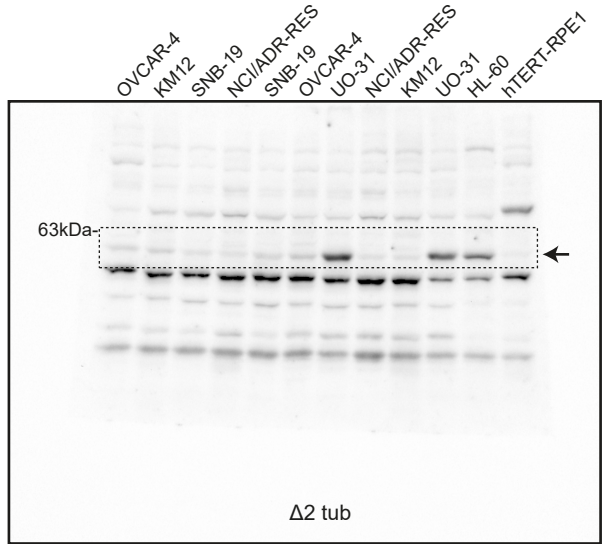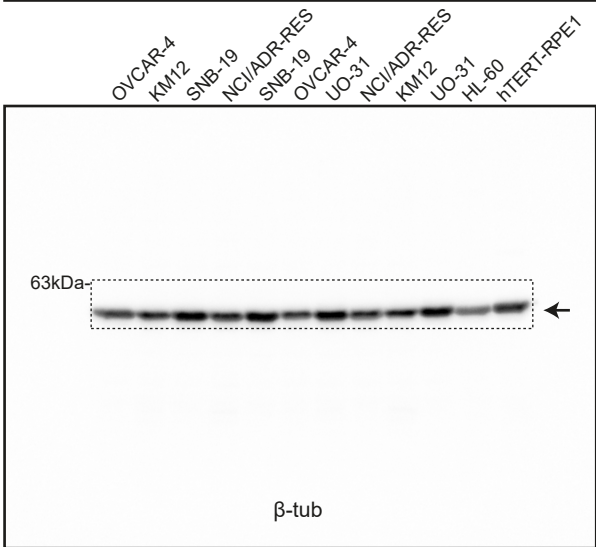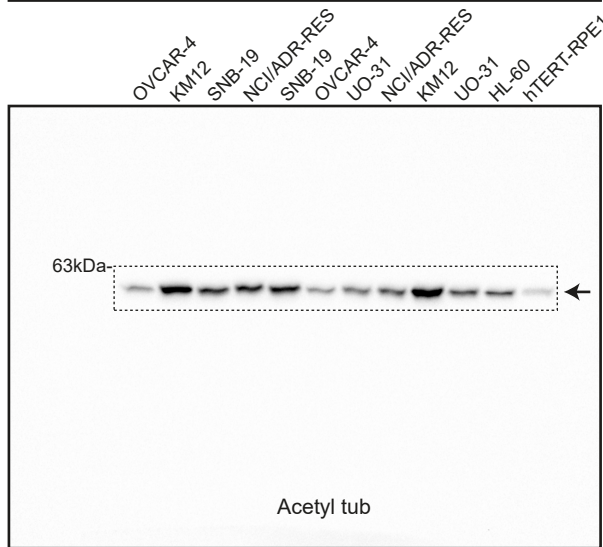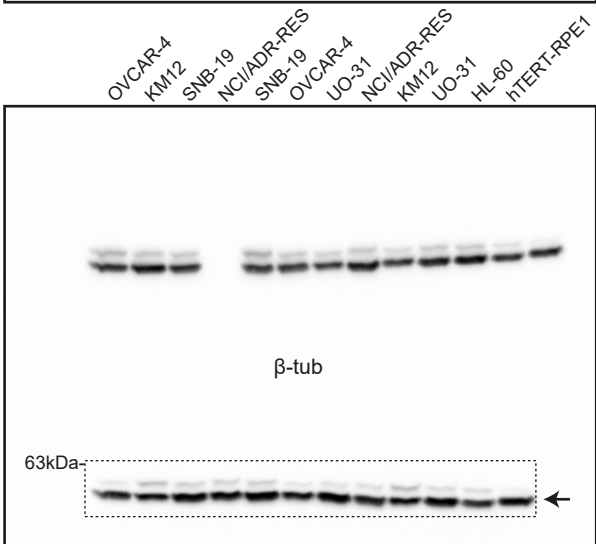

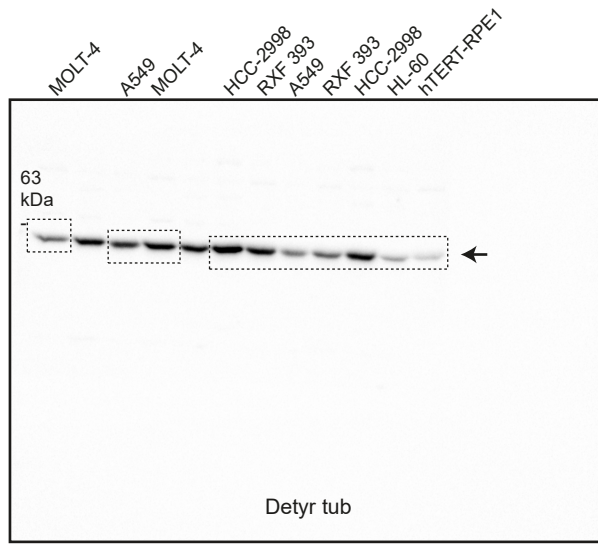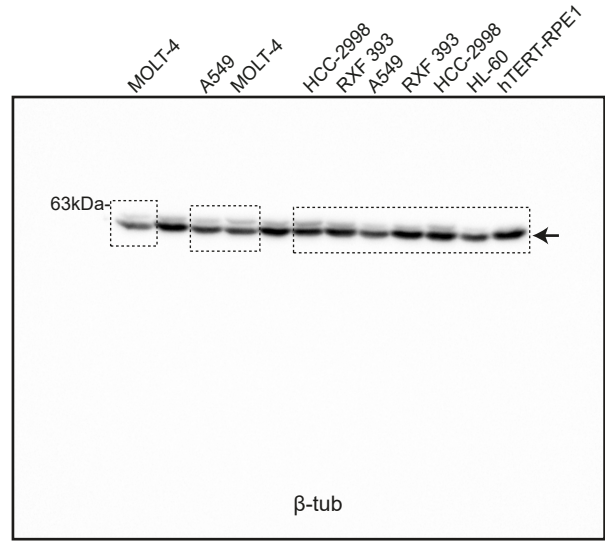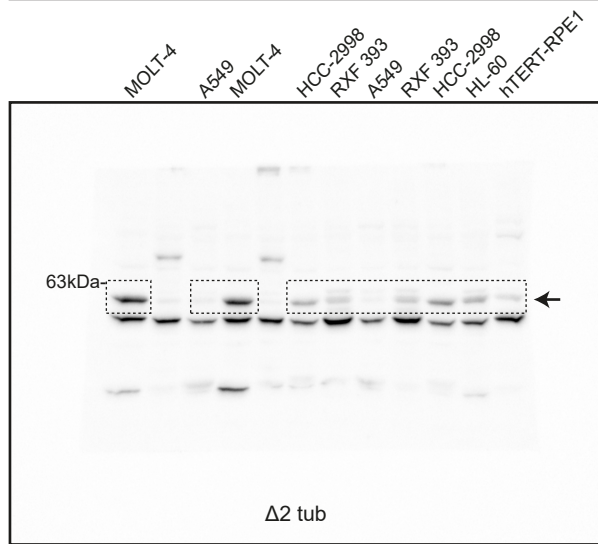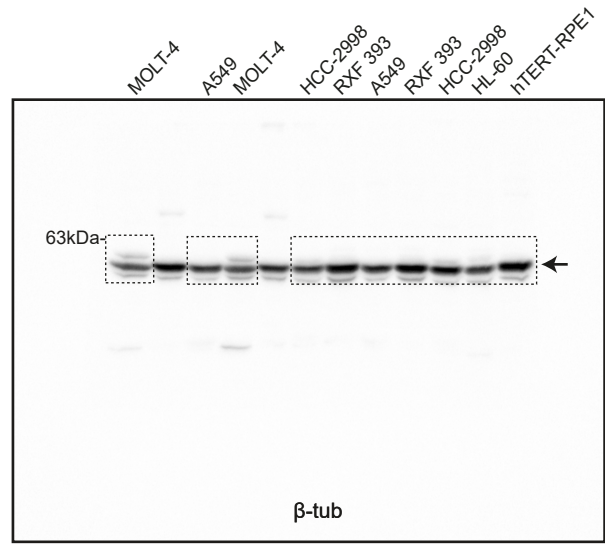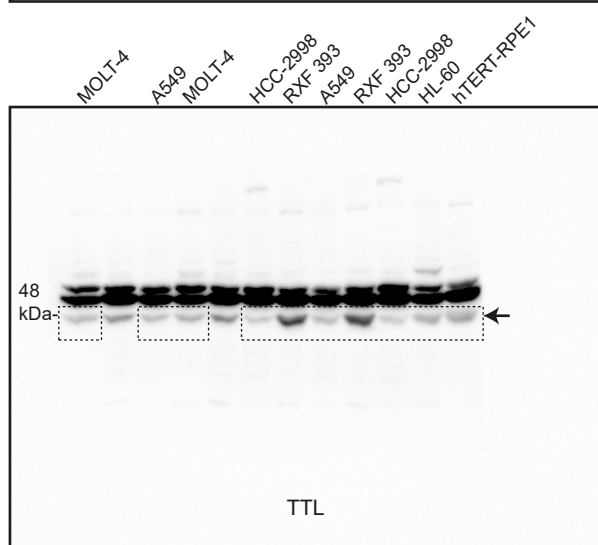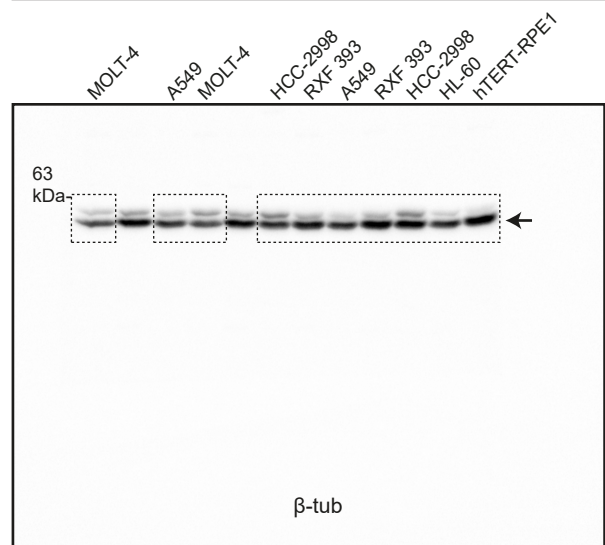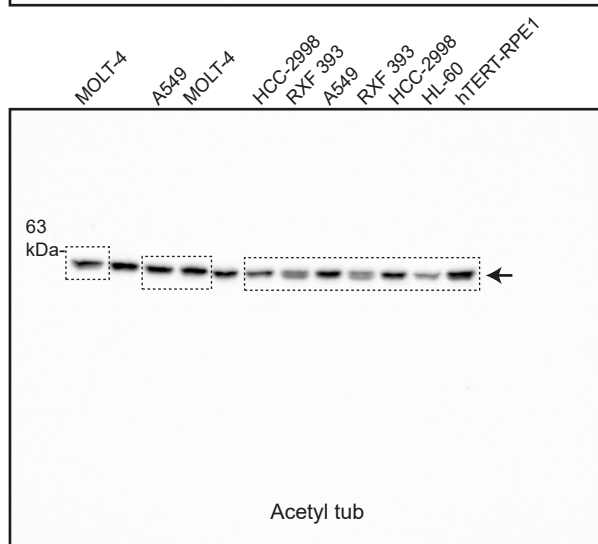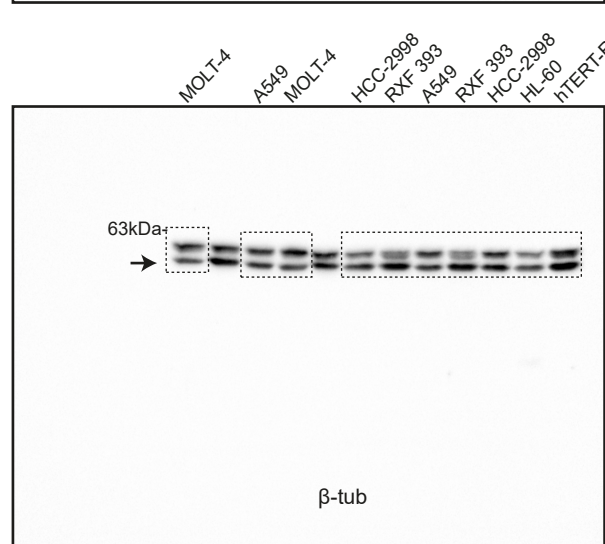

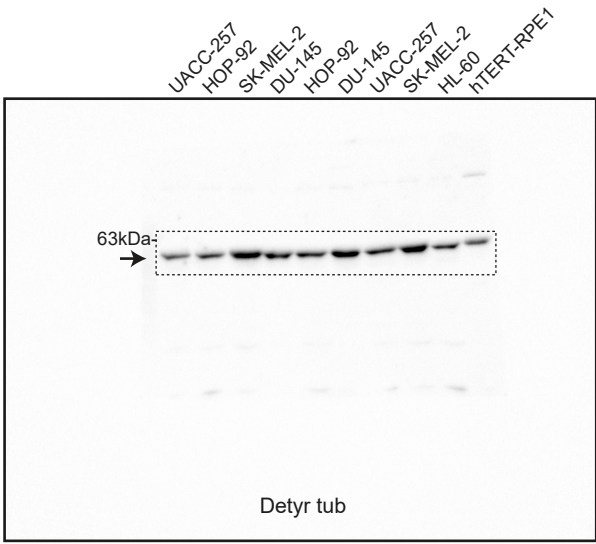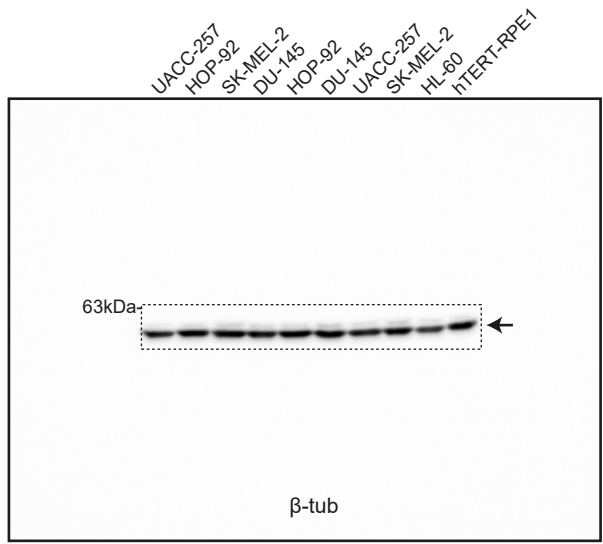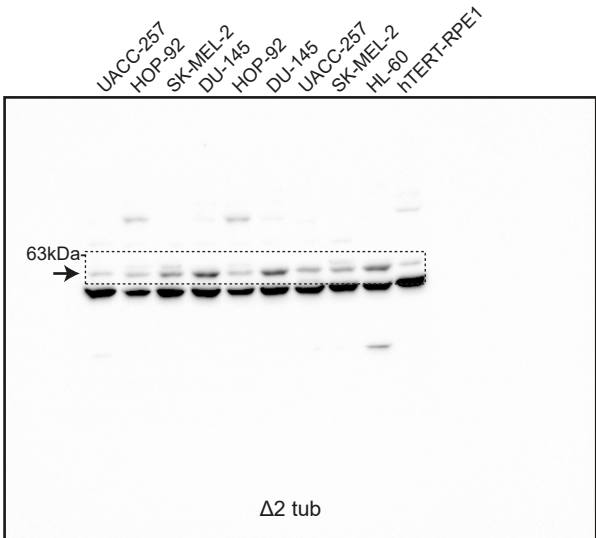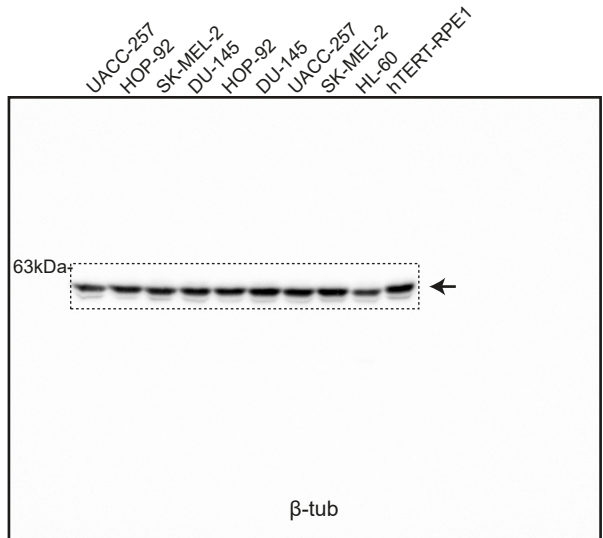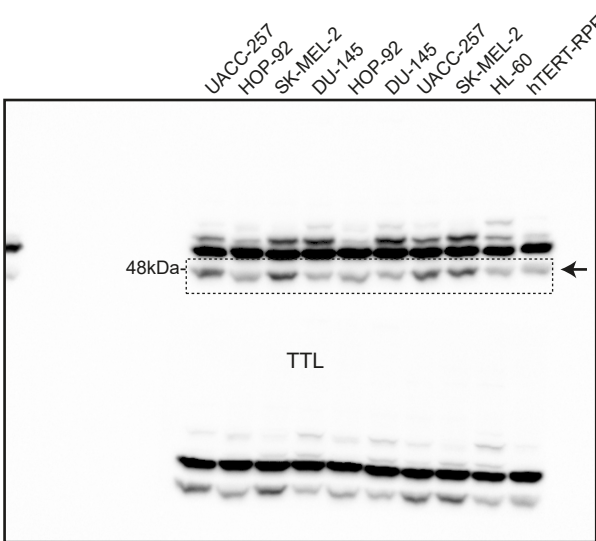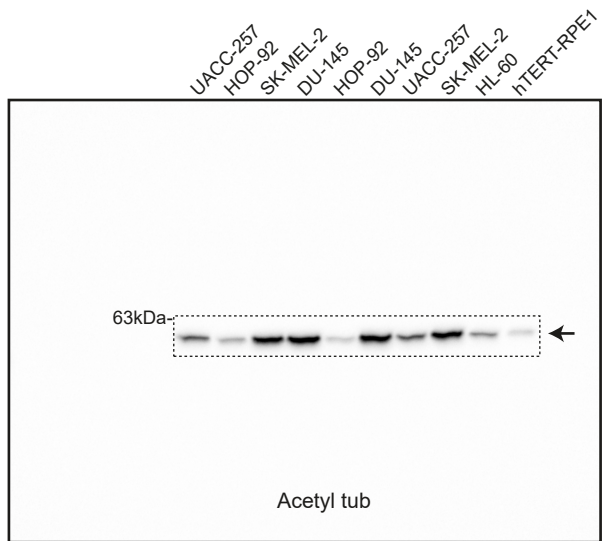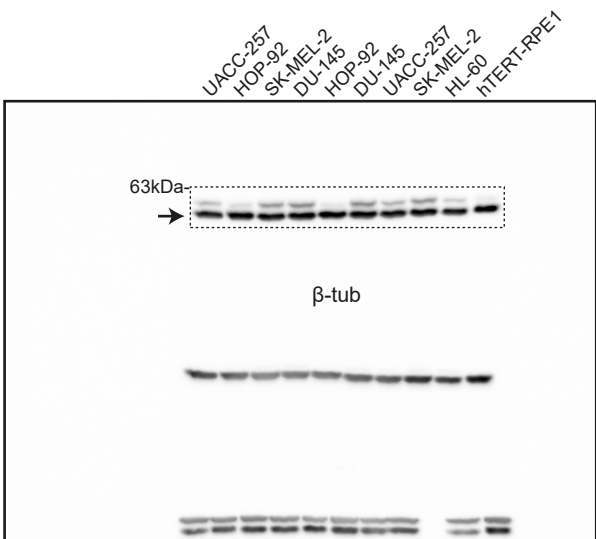

Supplement: JCB_202205092_SourceDataFS1.pdf [file JCB_202205092_SourceDataFS1.pdf]

**Fig. S2A**

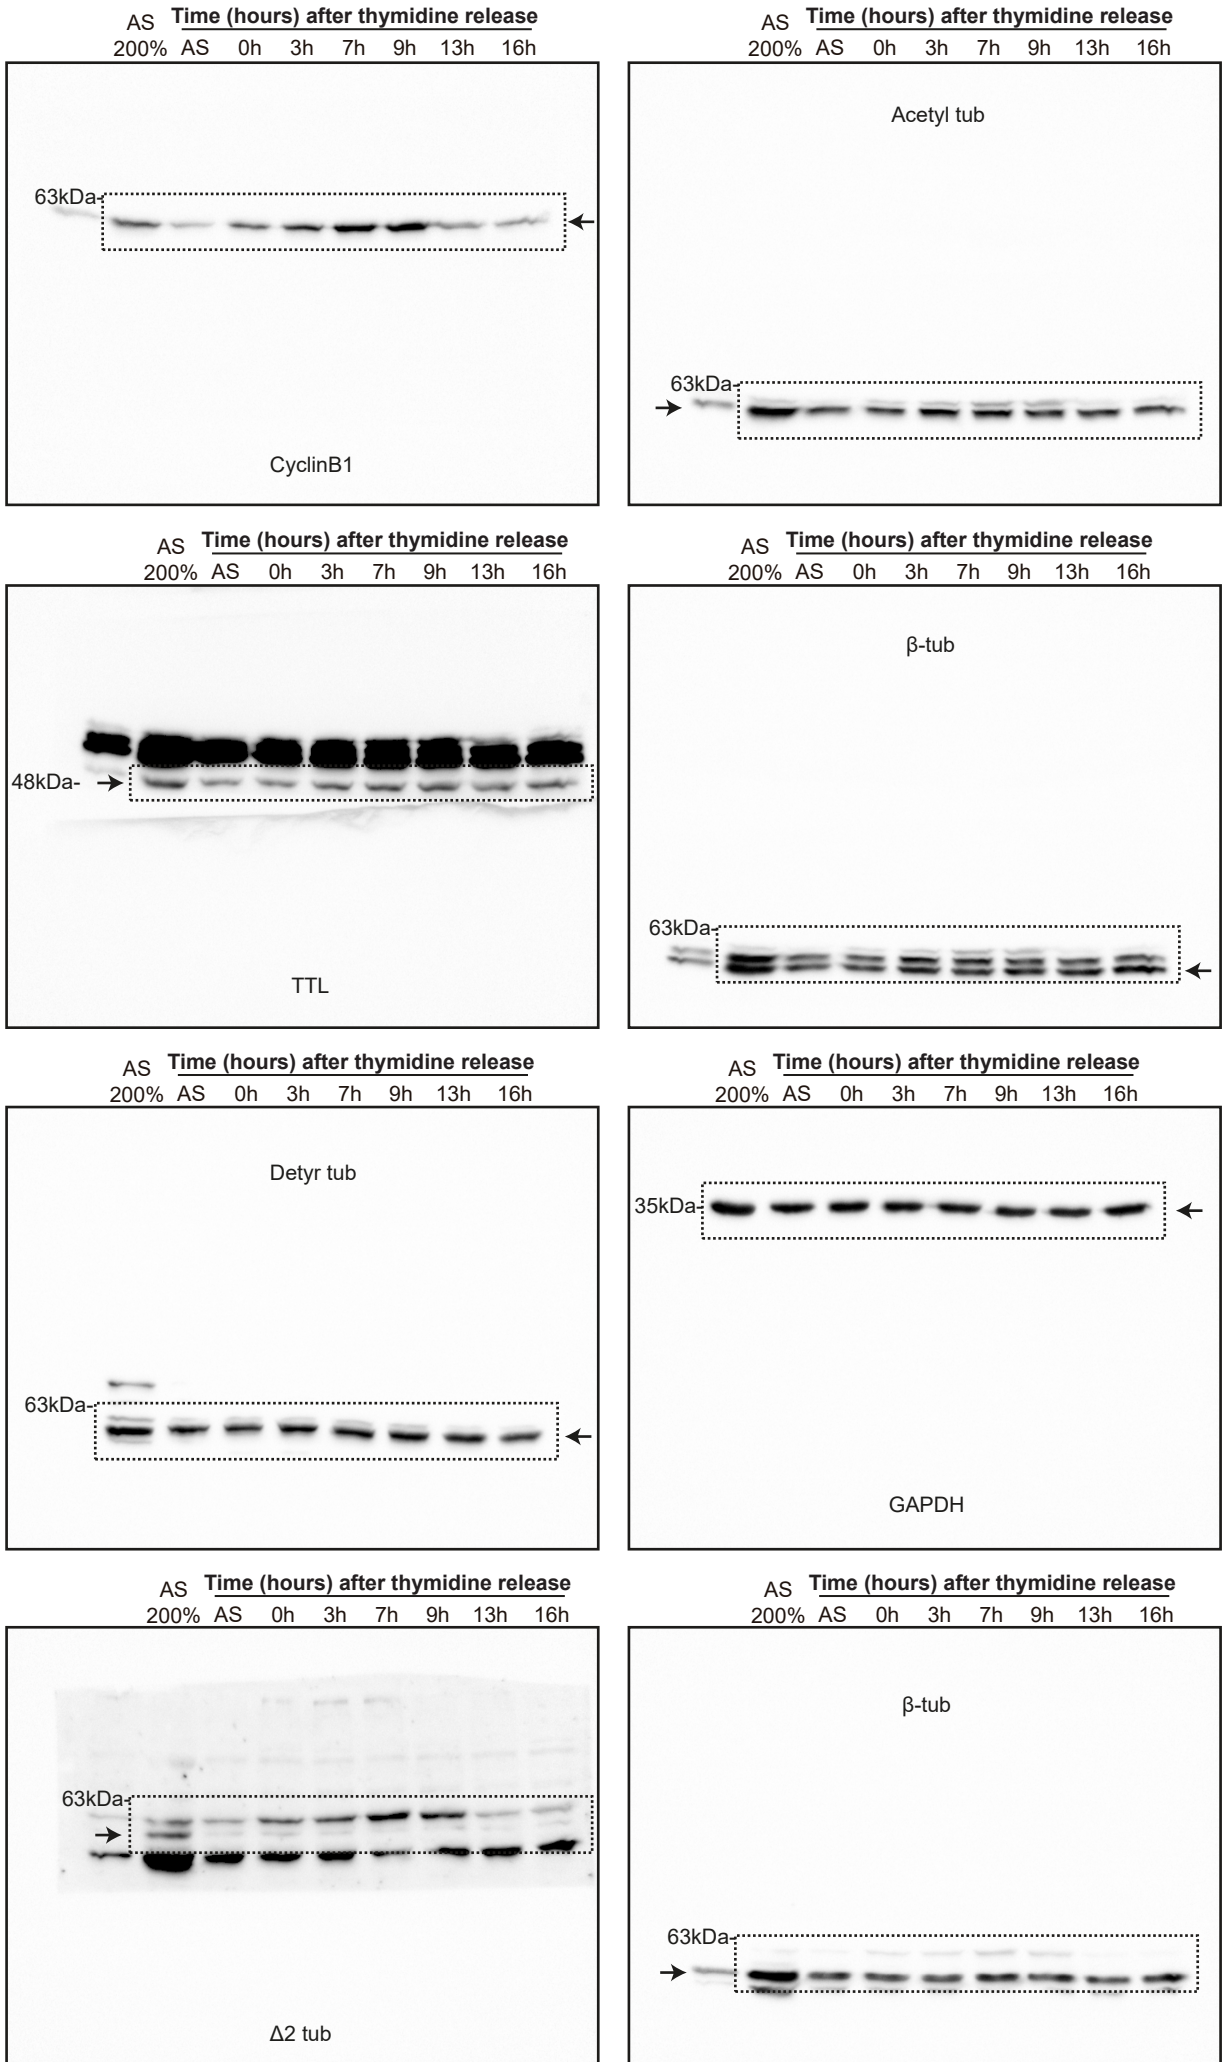

Fig. S2D

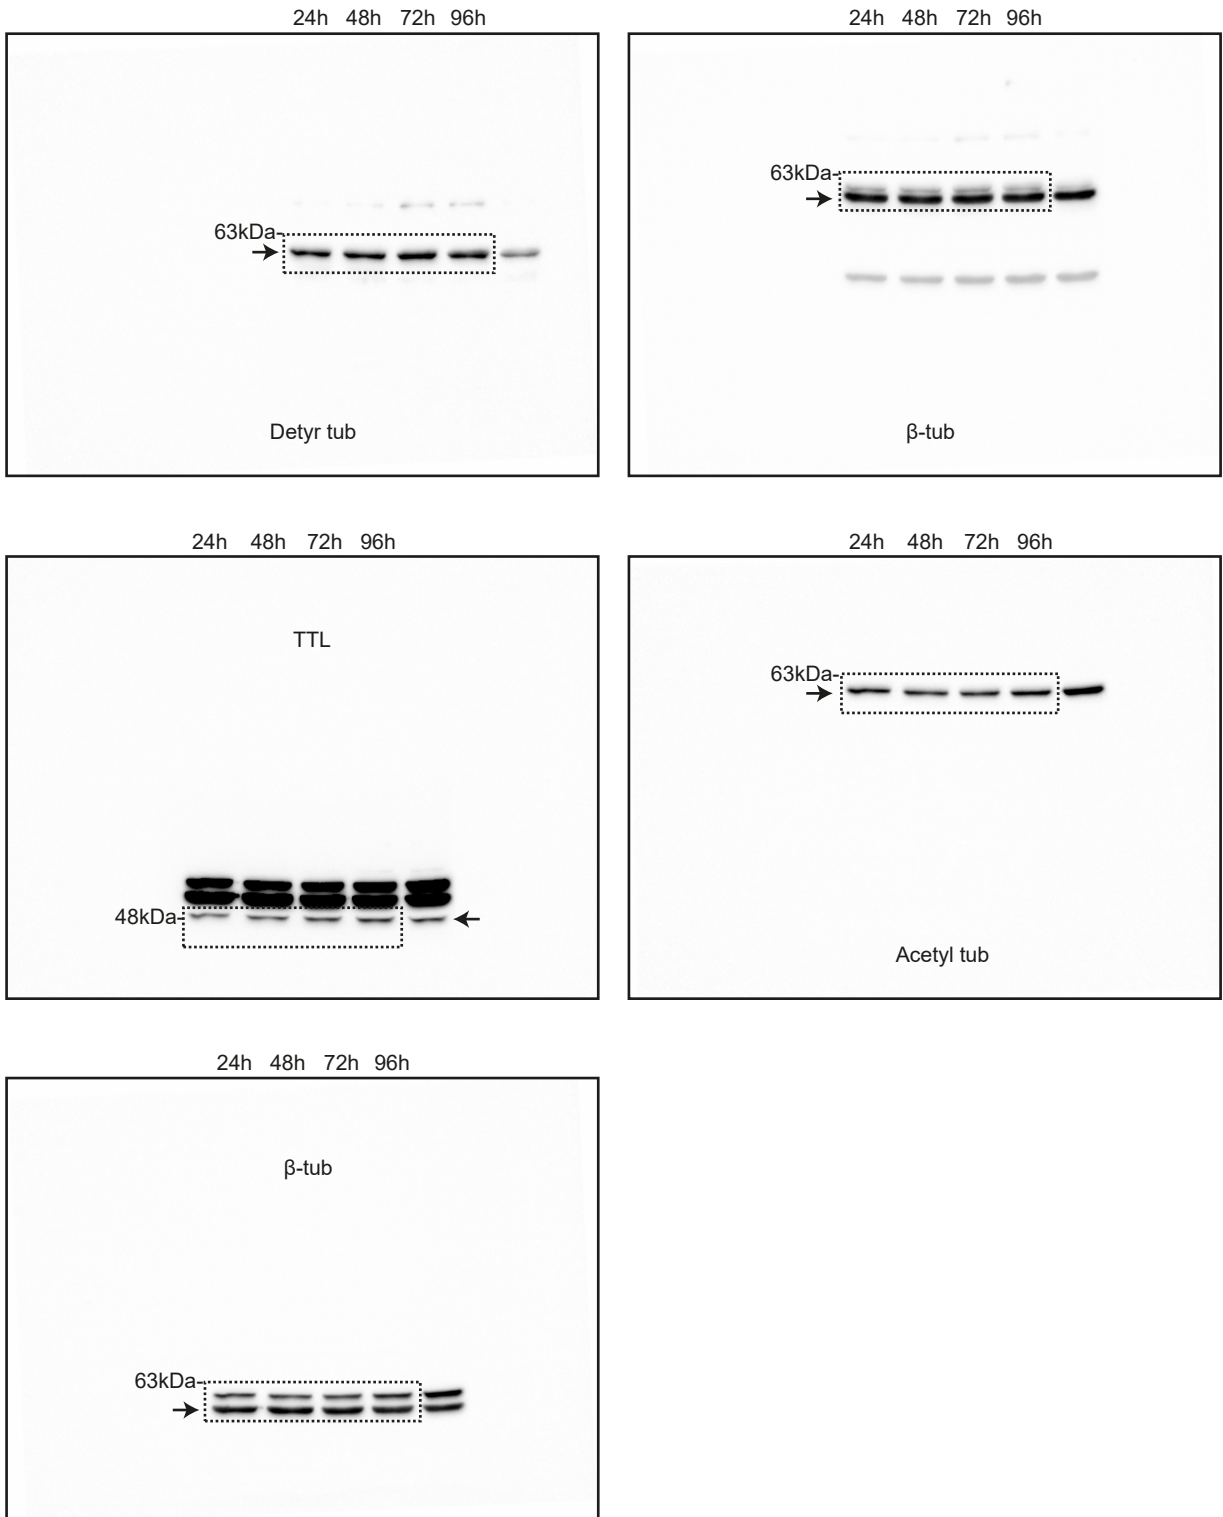

Supplement: JCB_202205092_SourceDataFS2.pdf [file JCB_202205092_SourceDataFS2.pdf]

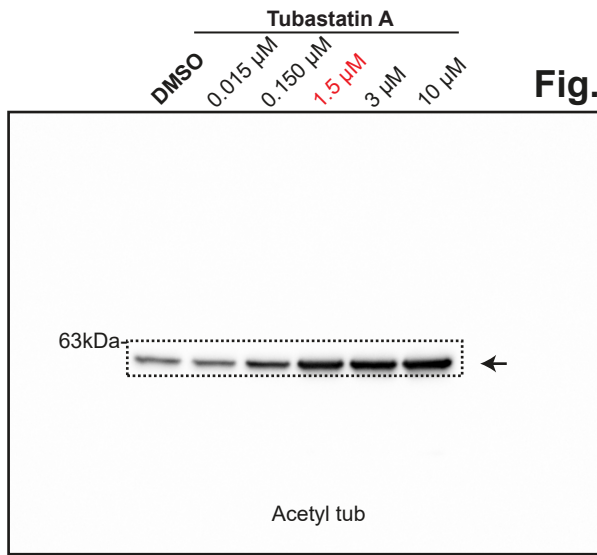

**Fig. S5A**

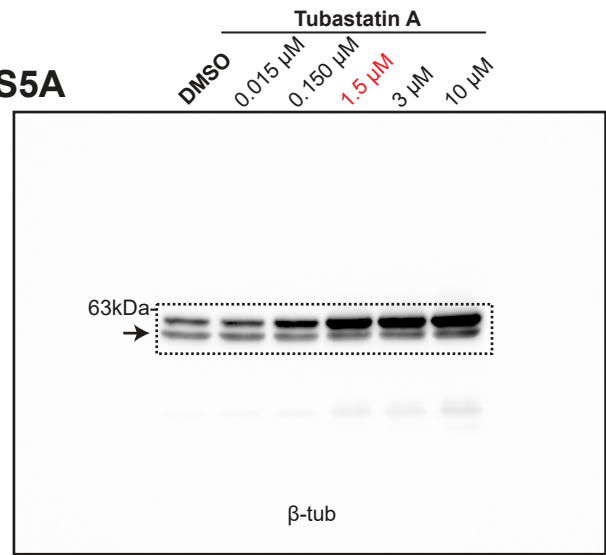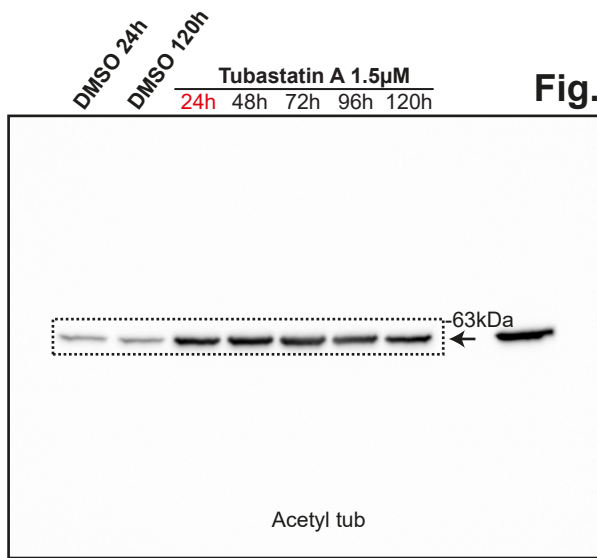

**Fig. S5B**

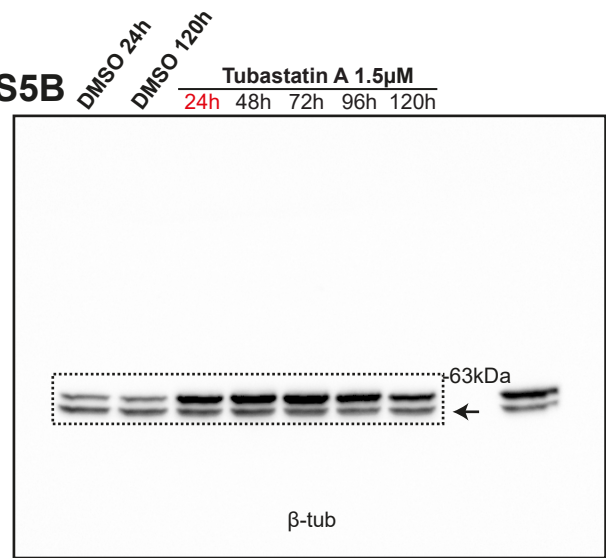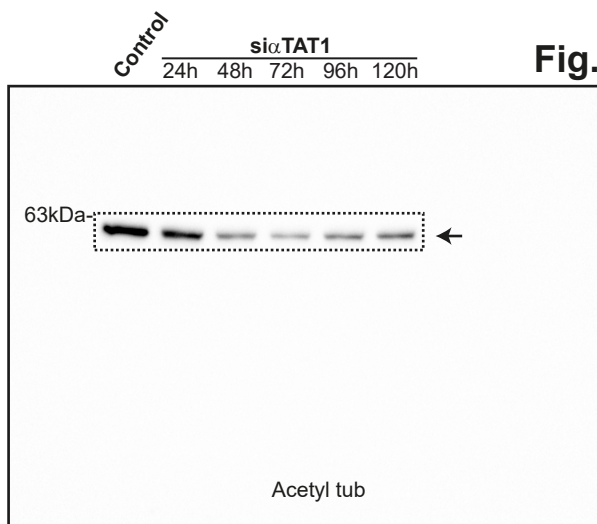

**Fig. S5C**

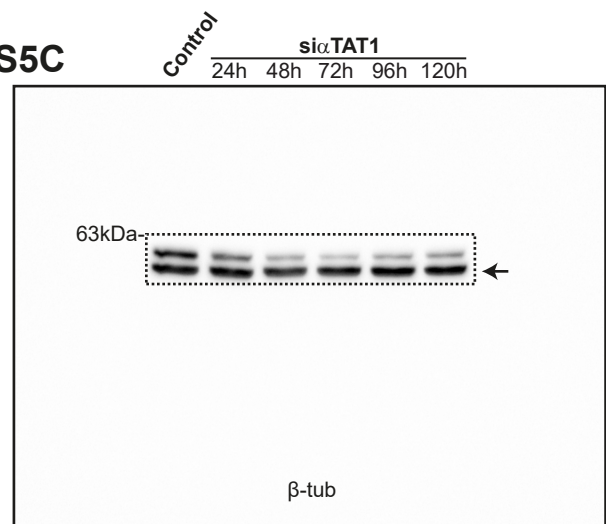

Fig. S5D

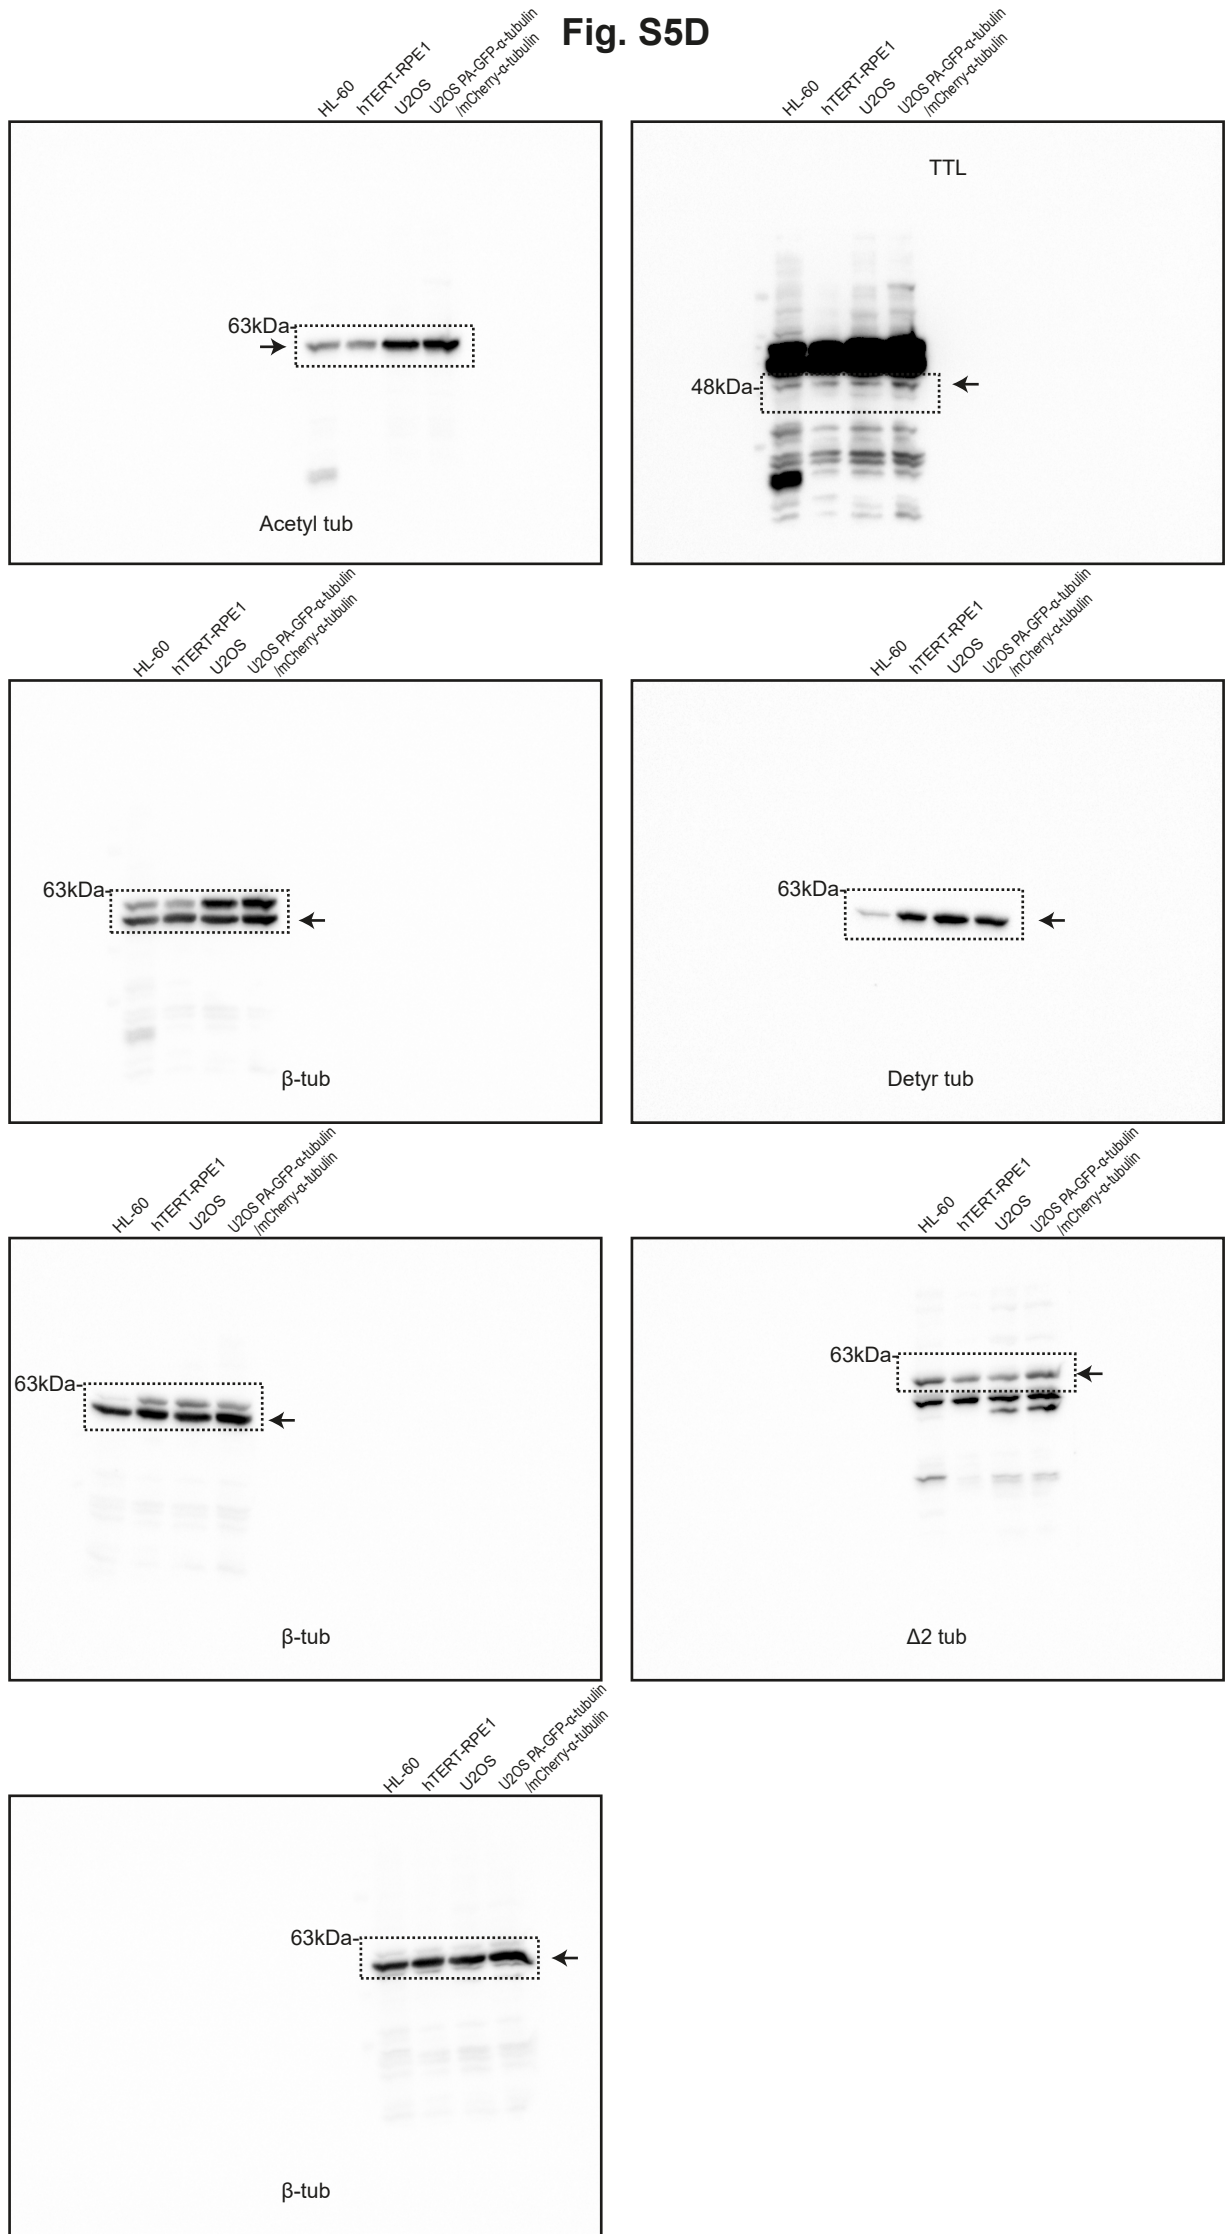

Supplement: JCB_202205092_SourceDataFS5.pdf [file JCB_202205092_SourceDataFS5.pdf]
